# Supplementary material for: An intriguing tetranuclear Rh-based polyoxometalate for the reduction of nitroarene and oxidation of aniline
Source: Royal Society of Chemistry journal article supplement (doi:10.1039/d2cc03076d), 2022-01-01
Supplement: d2cc03076d1.pdf [file d2cc03076d1.pdf]

# Intriguing tetranuclear Rh-based polyoxometalate for the reduction of nitroarene and oxidation of aniline

Wenjing Chen, Huafeng Li, Yuzhen Jin, Che Wu, Zelong Yuan, Pengtao Ma, Jingping Wang \* and Jingyang Niu \*<sup>a</sup>

[a]Henan Key Laboratory of Polyoxometalate Chemistry, College of Chemistry and Chemical Engineering, Henan University, Kaifeng, Henan 475004, (P. R. China), Fax: (+86)-371-23886876, E-mail: [jyniu@henu.edu.cn](mailto:jyniu@henu.edu.cn), [jpwang@henu.edu.cn](mailto:jpwang@henu.edu.cn)

## Content:

### Materials and Physical Measurements

#### Syntheses of 1

#### X-ray crystallography

**Fig. S1** Polyhedral combination demonstration and simplification of  $\{As_4W_{40}\}$ .

**Fig. S2** Ball-and-stick representations of  $\{Rh_4W_4\}$ . a) view from the front; b) view from the side.

**Fig. S3** (a) Orthogonal arrangement of two  $Rh_2^{IV}(C_6H_4N_2S)^{8+}$  groups; (b) Simplify the display.

**Fig. S4** The trigonal-pyramid geometry of the Rh atoms (Rh1 and Rh2).

**Fig. S5** The coordination geometries of (a) Rh1 in distorted octahedron; (b) Rh2 in distorted octahedron.

**Fig. S6** The plane of W atoms. a) view from the front; b) view from the side.

**Fig. S7** The coordination geometries of (a) Rh3 in distorted octahedron; (b) Rh4 in distorted octahedron.

**Fig. S8** The XPS spectra for the fresh catalyst: (a) W 4f, (b) Rh 3d. Spectra analysis was carried out using peak fitting with a Gaussian–Lorentzian peak shape and Shirley type background subtraction, and the C 1s peak typically located at 284.6 eV is used as a reference.

**Fig. S9** PXRD patterns of 1.

**Fig. S10** SEM image for 1.

**Fig. S11** The IR spectra of 1.

**Fig. S12** Thermogravimetric curve of 1.

**Fig. S13** Size distribution of 1 by Dynamic light scattering (DLS) at a concentration of 1  $\mu$ M. a) in the nitrobenzene reduction catalytic system, b) in the oxidation of aniline catalytic system.

**Fig. S14** Recycling experiments of 1 for reduction of nitroarene and oxidation of aniline.

**Fig. S15** Time-dependent UV-Vis spectra of 1 in the nitrobenzene reduction catalytic system, a)  $1.0 \times 10^{-6}$  M, b)  $1.0 \times 10^{-4}$  M. Time-dependent UV-Vis spectra of 1 in the oxidation of aniline catalytic system, c)  $1.0 \times 10^{-6}$  M, d)  $1.0 \times 10^{-4}$  M.

**Fig. S16** The GC-MS spectrum of aniline. (bottom, simulation; top, experiment)

**Fig. S17** The GC-MS spectrum of azobenzene. (bottom, simulation; top, experiment)

**Scheme S1.** The reaction pathway of aniline oxidation.

**Table S1** Crystallographic Data Parameters for 1.

**Table S2** Selected bond distances (Å) for polyanion 1a.

**Table S3** Selected bond angle (°) for polyanion 1a.

**Table S4** Bond valence sum (BVS) calculations of Rh, As, W and O atoms in 1a.

**Table S5** Optimization of 1 for reduction of nitrobenzene to aniline 2a<sup>a</sup>

**Table S6** Effect of the amount of catalyst and additive on the yields of azobenzene 3a<sup>a</sup>

**Table S7** Effect of temperature, solvent and time on the yields of azobenzene 3a<sup>a</sup>

**Table S8** Catalytic oxidation of aniline derivatives to azobenzenes by 1<sup>a,b</sup>

**Table S9** Summary of the yield of the reduction of nitrobenzene with different catalysts.

**Table S10** Summary of the yield of the oxidation of aniline to azobenzene with different catalysts.

**Table S11** Assignment of peaks in negative mode mass spectra of after catalysis of 1.

**Fig. S18** <sup>1</sup>H NMR spectra of 2a (500 MHz, CDCl<sub>3</sub>).

**Fig. S19** <sup>13</sup>C NMR spectra of 2a (126 MHz, CDCl<sub>3</sub>).

**Fig. S20** <sup>1</sup>H NMR spectra of 2b (500 MHz, CDCl<sub>3</sub>).

**Fig. S21** <sup>13</sup>C NMR spectra of 2b (126 MHz, CDCl<sub>3</sub>).

**Fig. S22** <sup>1</sup>H NMR spectra of 2c (500 MHz, CDCl<sub>3</sub>).

**Fig. S23** <sup>13</sup>C NMR spectra of 2c (126 MHz, CDCl<sub>3</sub>).

**Fig. S24** <sup>1</sup>H NMR spectra of 2d (500 MHz, CDCl<sub>3</sub>).

**Fig. S25** <sup>13</sup>C NMR spectra of 2d (126 MHz, CDCl<sub>3</sub>).

**Fig. S26**  $^1\text{H}$  NMR spectra of **2e** (500 MHz,  $\text{CDCl}_3$ ).  
**Fig. S27**  $^{13}\text{C}$  NMR spectra of **2e** (126 MHz,  $\text{CDCl}_3$ ).  
**Fig. S28**  $^1\text{H}$  NMR spectra of **2f** (500 MHz,  $\text{CDCl}_3$ ).  
**Fig. S29**  $^{13}\text{C}$  NMR spectra of **2f** (126 MHz,  $\text{CDCl}_3$ ).  
**Fig. S30**  $^1\text{H}$  NMR spectra of **2g** (500 MHz,  $\text{CDCl}_3$ ).  
**Fig. S31**  $^{13}\text{C}$  NMR spectra of **2g** (126 MHz,  $\text{CDCl}_3$ ).  
**Fig. S32**  $^1\text{H}$  NMR spectra of **2h** (500 MHz,  $\text{CDCl}_3$ ).  
**Fig. S33**  $^{13}\text{C}$  NMR spectra of **2h** (126 MHz,  $\text{CDCl}_3$ ).  
**Fig. S34**  $^1\text{H}$  NMR spectra of **2i** (500 MHz,  $\text{CDCl}_3$ ).  
**Fig. S35**  $^{13}\text{C}$  NMR spectra of **2i** (126 MHz,  $\text{CDCl}_3$ ).  
**Fig. S36**  $^1\text{H}$  NMR spectra of **3a** (500 MHz,  $\text{CDCl}_3$ ).  
**Fig. S37**  $^{13}\text{C}$  NMR spectra of **3a** (126 MHz,  $\text{CDCl}_3$ ).  
**Fig. S38**  $^1\text{H}$  NMR spectra of **3b** (500 MHz,  $\text{CDCl}_3$ ).  
**Fig. S39**  $^{13}\text{C}$  NMR spectra of **3b** (126 MHz,  $\text{CDCl}_3$ ).  
**Fig. S40**  $^1\text{H}$  NMR spectra of **3c** (500 MHz,  $\text{CDCl}_3$ ).  
**Fig. S41**  $^{13}\text{C}$  NMR spectra of **3c** (126 MHz,  $\text{CDCl}_3$ ).  
**Fig. S42**  $^1\text{H}$  NMR spectra of **3d** (500 MHz,  $\text{CDCl}_3$ ).  
**Fig. S43**  $^{13}\text{C}$  NMR spectra of **3d** (126 MHz,  $\text{CDCl}_3$ ).  
**Fig. S44**  $^1\text{H}$  NMR spectra of **3e** (500 MHz,  $\text{CDCl}_3$ ).  
**Fig. S45**  $^{13}\text{C}$  NMR spectra of **3e** (126 MHz,  $\text{CDCl}_3$ ).  
**Fig. S46**  $^1\text{H}$  NMR spectra of **3f** (500 MHz,  $\text{CDCl}_3$ ).  
**Fig. S47**  $^{13}\text{C}$  NMR spectra of **3f** (126 MHz,  $\text{CDCl}_3$ ).  
**Fig. S48**  $^1\text{H}$  NMR spectra of **3g** (500 MHz,  $\text{CDCl}_3$ ).  
**Fig. S49**  $^{13}\text{C}$  NMR spectra of **3g** (126 MHz,  $\text{CDCl}_3$ ).  
**Fig. S50**  $^1\text{H}$  NMR spectra of **3h** (500 MHz,  $\text{CDCl}_3$ ).  
**Fig. S51**  $^{13}\text{C}$  NMR spectra of **3h** (126 MHz,  $\text{CDCl}_3$ ).  
**Fig. S52**  $^1\text{H}$  NMR spectra of **3i** (500 MHz,  $\text{CDCl}_3$ ).  
**Fig. S53**  $^{13}\text{C}$  NMR spectra of **3i** (126 MHz,  $\text{CDCl}_3$ ).  
**Fig. S54**  $^1\text{H}$  NMR spectra of **3j** (500 MHz,  $\text{CDCl}_3$ ).  
**Fig. S55**  $^{13}\text{C}$  NMR spectra of **3j** (126 MHz,  $\text{CDCl}_3$ ).  
**Fig. S56**  $^1\text{H}$  NMR spectra of **3k** (500 MHz,  $\text{CDCl}_3$ ).  
**Fig. S57**  $^{13}\text{C}$  NMR spectra of **3k** (126 MHz,  $\text{CDCl}_3$ ).  
**Fig. S58**  $^1\text{H}$  NMR spectra of **3l** (500 MHz,  $\text{CDCl}_3$ ).  
**Fig. S59**  $^{13}\text{C}$  NMR spectra of **3l** (126 MHz,  $\text{CDCl}_3$ ).  
**Fig. S60**  $^1\text{H}$  NMR spectra of **3m** (500 MHz,  $\text{CDCl}_3$ ).  
**Fig. S61**  $^{13}\text{C}$  NMR spectra of **2m** (126 MHz,  $\text{CDCl}_3$ ).  
**Fig. S62**  $^1\text{H}$  NMR spectra of **3n** (500 MHz,  $\text{CDCl}_3$ ).  
**Fig. S63**  $^{13}\text{C}$  NMR spectra of **3n** (126 MHz,  $\text{CDCl}_3$ ).  
**Fig. S64**  $^1\text{H}$  NMR spectra of **3o** (500 MHz,  $\text{CDCl}_3$ ).  
**Fig. S65**  $^{13}\text{C}$  NMR spectra of **3o** (126 MHz,  $\text{CDCl}_3$ ).

## Materials and Physical Measurements

All chemicals were purchased commercially without further purification. The precursor  $K_{14}[As_2W_{19}O_{67}(H_2O)]$  ( $As_2W_{19}$ ) was obtained from the literature and corroborated by IR spectroscopy. An Elementar VarioELcube CHNS analyzer was used to record the elemental analyses. Using KBr pellets, IR spectra in the range of 500–4000  $cm^{-1}$  were collected on a Bruker VERTEX 70 IR spectrometer. The X-ray powder diffractometer (Bruker, D8 Advance) was used to record X-ray powder diffraction (PXRD) patterns in the  $2\theta$  angular range of 5–50° under Cu  $K\alpha$  radiation. The U-4100 spectrophotometer was used to measure UV/vis absorption spectra at room temperature. Thermogravimetric analyses (TGA) were carried out in a  $N_2$  environment in the temperature range of 25 to 950 °C with a heating rate of 10 °C  $min^{-1}$  using a NETZSCH STA 449 F5 Jupiter thermal analyzer. For inductively coupled plasma-atomic emission spectrometry (ICP-AES) analyses (Na, Rh, As, and W), a Perkin Elmer Optima 2100 DV spectrometer was chosen. The X-ray photoelectron spectra (XPS) were recorded on a Thermo Scientific K-Alpha spectrometer with monochromatic Al ( $h\nu = 1486.6$  eV) as the excitation source. The ABSCIEX triple-TOF 4600 mass spectrometer was used to perform electrospray ionization-mass spectrometry (ESI-MS). On a Bruker 450-GC with a flame ionization detector and a 30 m column with nitrogen as the carrier gas, GC-MS (Agilent 7890B GC/5973B MS, SE-54 capillary column) and GC analyses were performed. The Bruker AVANCE NEO 500 MHz NMR spectrometer was used to record  $^1H$  and  $^{13}C$  NMR spectra.

## Syntheses of **1**

$As_2W_{19}$  was added to 10 ml of sodium acetate buffer solution (1 M, pH = 4.5) and stirred for 10 min. The mixed solution was adjusted to pH=2.6 with 12 M HCl, and then  $RhCl_3 \cdot 3H_2O$  (0.1 g) and 2,1,3-Benzothiadiazole (0.05 g) were added, with the solution having a colorless change to red. After continuing stirring for 1 h the mixed solution was sealed in a 25 mL Teflon-lined autoclave and heated at 200°C for 72 h. Following cooling to room temperature, the solution was filtered and slowly evaporated. Yellow flaky crystal **1** was obtained after two weeks. Yield: 2.11% (0.015 g, based on Rh). Elemental analysis calcd (%) for **1**: Na, 1.05; As, 2.56; Rh, 4.97; W, 62.77; C, 5.33; H, 0.53; N, 1.91; S, 0.55. Found: Na, 1.20; As, 2.56; Rh, 5.02; W, 66.56; C, 4.19; H, 0.59; N, 1.86; S, 0.65. IR (KBr pellet,  $cm^{-1}$ ): 3472 (br), 2925 (s), 1626 (s), 970 (s), 836 (s), 804 (s), 717 (s), 621 (s), 575 (s).

## X-ray crystallography

On the Bruker D8 VENTURE PHOTON II CCD diffractometer, a yellow flaky crystal was chosen and put. The crystal data was collected using a graphite-monochromated Mo  $K\alpha$  ( $\lambda = 0.71073$  Å) radiation source. The SHELXT structure solution program was used to solve all the structures, and the SHELXL refinement package in Olex2 was used for the full-matrix least-squares algorithm on  $F^2$  data.<sup>1,2</sup> The C, N, O, S, As, Rh, W, Cl and Na atoms were refined into anisotropy in the final refinement cycle. The Fourier maps and TGA data validated the assignment of water molecules. Placing the hydrogen atoms from the organic ligands in the calculated position. Table S1 shows the crystallographic data and structural refinement parameters for **1**, with CCDC number: 2153638.

## Catalytic cycle process

The products were all extracted with hexane. Add excess hexane to the reaction mother liquor (the ratio of mother liquor to hexane by volume is 1:10). The solution will be divided into two layers, with the upper layer being the hexane layer and the lower layer being the mother liquor layer (The color of mother liquor: yellow, in the reduction system; orange, in the oxidation system).<sup>3</sup> After shaking well, collect the bottom layer of mother liquor and discard the rest. The collected mother liquor will be concentrated on a rotary evaporator, and after concentration, the original volume of solvent will be added and used for the next cycle.

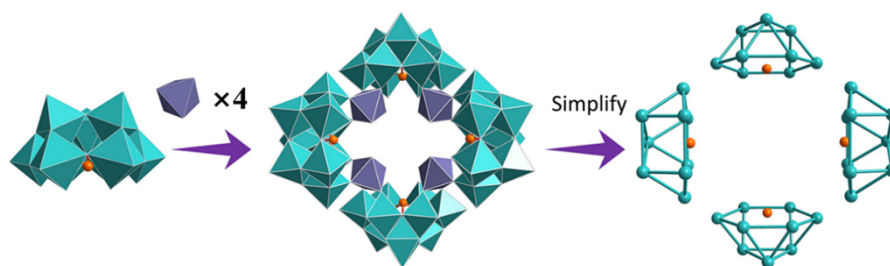

**Fig. S1** Polyhedral combination demonstration and simplification of  $\{As_4W_{40}\}$ .

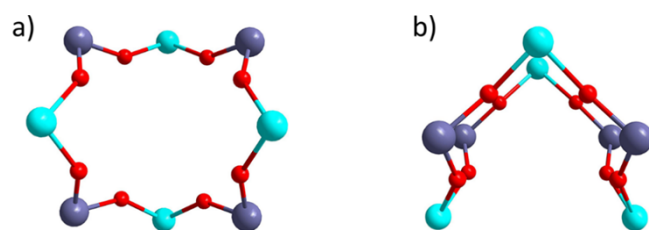

**Fig. S2** Ball-and-stick representations of  $\{Rh_4W_4\}$ . a) view from the front; b) view from the side.

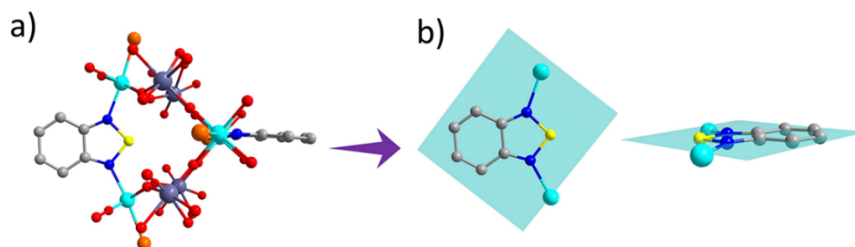

**Fig. S3** (a) Orthogonal arrangement of two  $Rh_2^{IV}(C_6H_4N_2S)^{8+}$  groups; (b) Simplify the display.

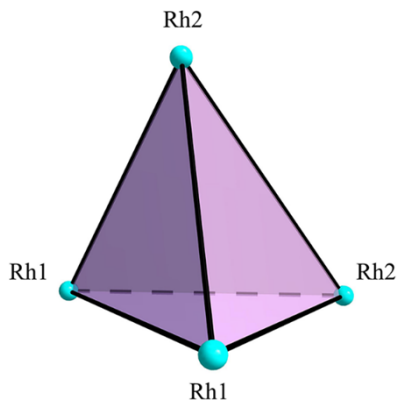

**Fig. S4** The trigonal-pyramid geometry of the Rh atoms (Rh1 and Rh2).

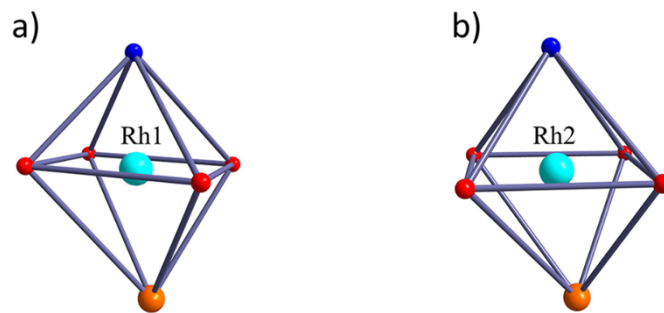

**Fig. S5** The coordination geometries of (a) Rh1 in distorted octahedron; (b) Rh2 in distorted octahedron.

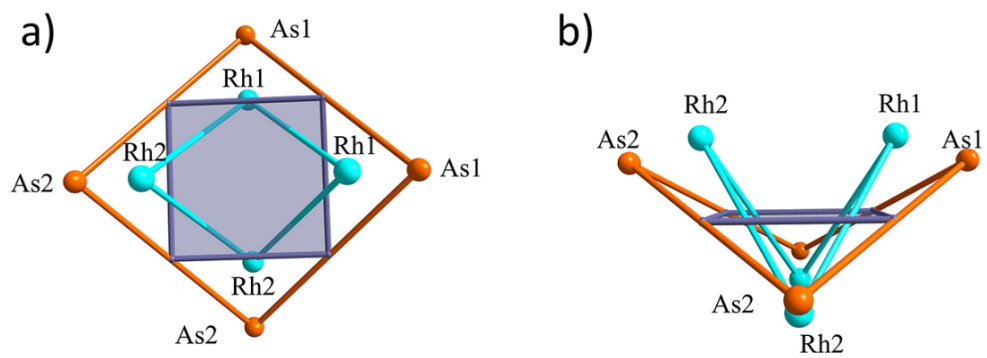

**Fig. S6** The plane of W atoms. a) view from the front; b) view from the side.

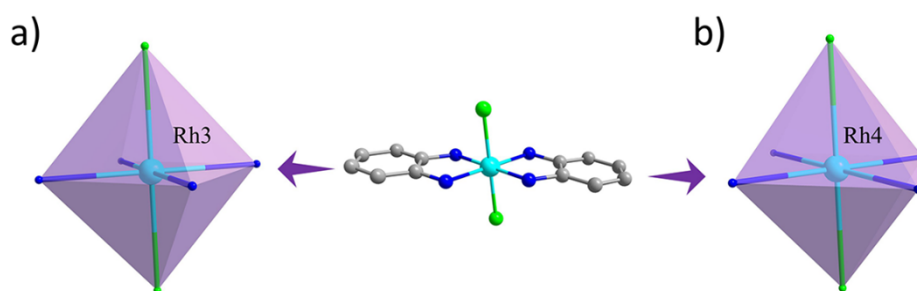

**Fig. S7** The coordination geometries of (a) Rh3 in distorted octahedron; (b) Rh4 in distorted octahedron.

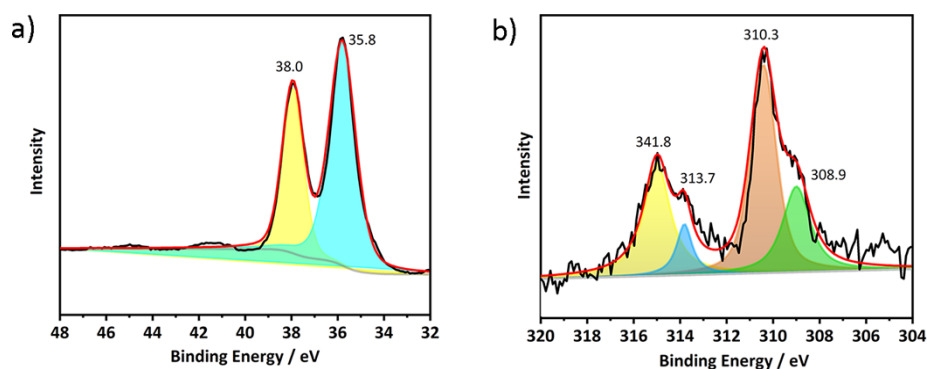

**Fig. S8** The XPS spectra for the fresh catalyst: (a) W 4f, (b) Rh 3d. Spectra analysis was carried out using peak fitting with a Gaussian–Lorentzian peak shape and Shirley type background subtraction, and the C 1s peak typically located at 284.6 eV is used as a reference.

#### XPS Analyses

To further verify the valence state properties of **1**, the XPS spectra of Rh 3d and W 4f were recorded of the freshly prepared compound **1**, where the XPS peak value of W 4f was measured as  $\sim 35.8$  and  $38.0$  eV, corresponding to the binding energy of  $W^{VI}$ .<sup>4,5</sup> In addition, the Rh 3d spectra presented peaks at  $314.8$  and  $310.3$  eV, attributed to the binding energies of Rh  $3d_{3/2}$  and Rh  $3d_{5/2}$  of  $Rh^{IV}$ .<sup>6,7</sup> The Rh 3d spectra presented peaks at  $313.7$  and  $308.9$  eV, attributed to the binding energies of Rh  $3d_{3/2}$  and Rh  $3d_{5/2}$  of  $Rh^{III}$ .<sup>8,9</sup> Thus, Rh1 and Rh2 are tetravalent and Rh3 and Rh4 are trivalent. The XPS analysis results are consistent the BVS (Table S4, ESI<sup>†</sup>).

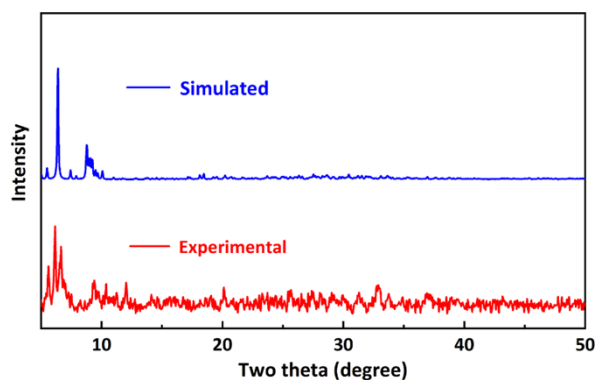

**Fig. S9** PXRD patterns of **1**.

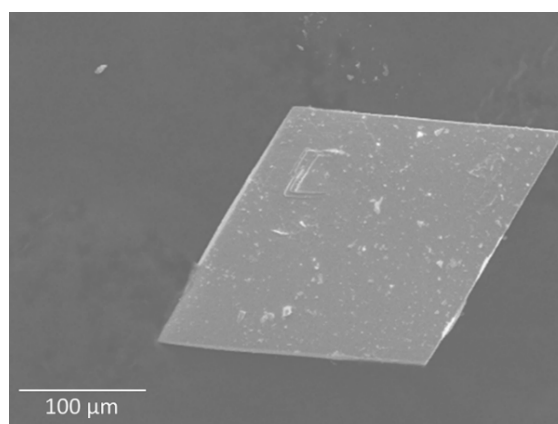

Fig. S10 SEM image for **1**.

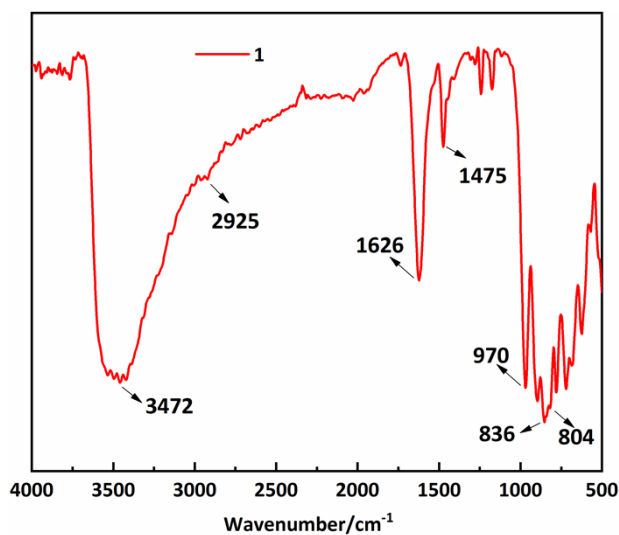

Fig. S11 The IR spectra of **1**.

The IR spectra of **1** were recorded with KBr particles at the range of 500-4000  $\text{cm}^{-1}$ , corresponding to the characteristic vibration mode of kegggin-type skeleton in the range of 1000-650  $\text{cm}^{-1}$ . The characteristic vibration absorption band at  $\lambda = 970 \text{ cm}^{-1}$  belongs to  $\text{W-O}_t$  vibration, while the  $\nu(\text{W-O}_b\text{-W})$  and  $\nu(\text{W-O}_c\text{-W})$  vibration bands are about 883  $\text{cm}^{-1}$  and 804  $\text{cm}^{-1}$  ( $\text{O}_t$  = terminal oxygen,  $\text{O}_b$  = bridged oxygen of two octahedrons sharing a corner,  $\text{O}_c$  = bridged oxygen connecting different octahedrons in the same group of three metal clusters), respectively.<sup>10,11</sup> The peak at 836  $\text{cm}^{-1}$  can be attributed to As-O vibration.<sup>12,13</sup> Additionally, the vibration peaks observed at 3472 and 1626  $\text{cm}^{-1}$  are ascribed to the vibration of lattice water molecules.<sup>14</sup> The weak band at around 2925  $\text{cm}^{-1}$  comes from the C-H stretching vibration.<sup>15,16</sup>

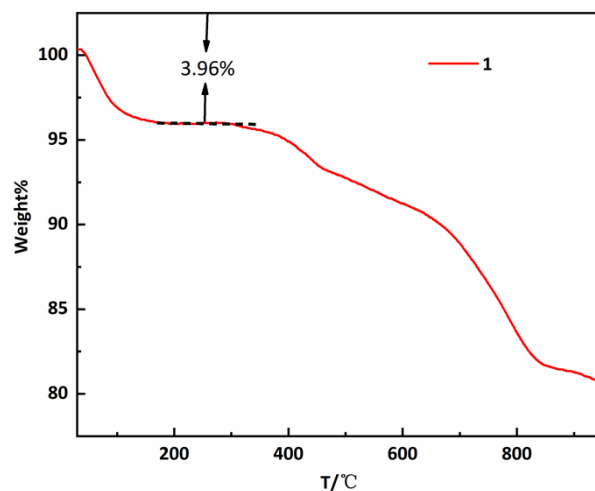

**Fig. S12** Thermogravimetric curve of **1**.

### Thermogravimetric Analyses.

The weight changes of **1** at programmed heating (10 °C/min) were measured in a temperature range of 25 °C to 950 °C in N<sub>2</sub> atmosphere. As shown in Figure S6, compound **1** exhibits two-step weightlessness at 25–950 °C. The weightlessness of 3.96% (25–250 °C) in the first step is the result of the loss of crystalline water molecules. In the second step, weight loss occurred in the range of 250–950 °C with a weight loss of 14.91%, corresponding to the decomposition of POM skeleton and the oxidation of ligands.<sup>17</sup>

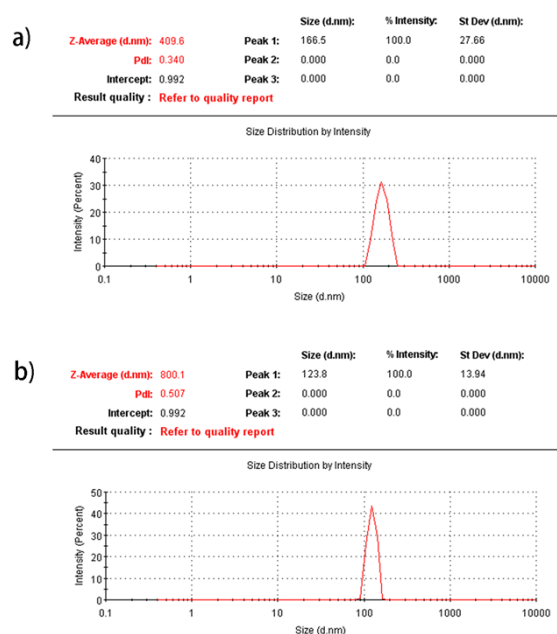

**Fig. S13** Size distribution of **1** by Dynamic light scattering (DLS) at a concentration of 1 μM. a) in the nitrobenzene reduction catalytic system, b) in the oxidation of aniline catalytic system.

DLS measurements were performed on the catalytic systems containing **1** and **2**, and the results showed that one nanoparticle was detected, respectively, indicating that **1** and **2** were homogeneous in the catalytic system.<sup>18,19</sup> In addition, the formation of 100-200 nm nanoparticles indicates that **1** and **2** are aggregated in the catalytic system, which is not uncommon.<sup>20</sup>



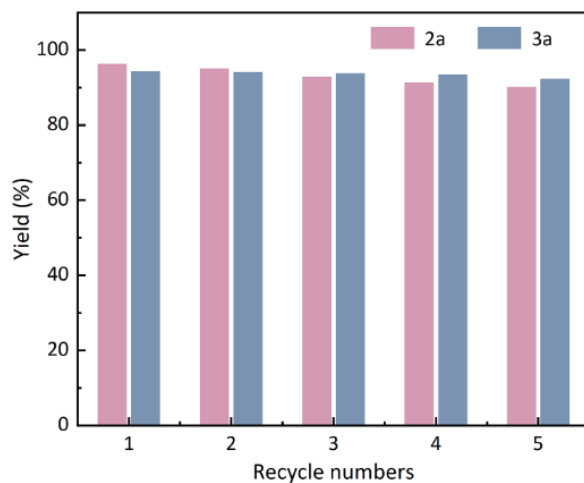

**Fig. S14** Recycling experiments of **1** for reduction of nitroarene and oxidation of aniline.

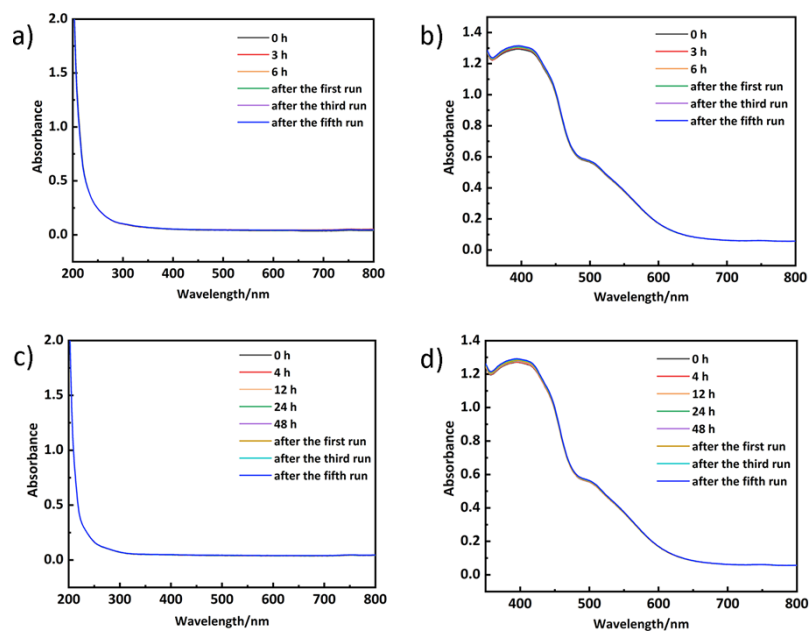

**Fig. S15** Time-dependent UV-Vis spectra of **1** in the nitrobenzene reduction catalytic system, a)  $1.0 \times 10^{-6}$  M, b)  $1.0 \times 10^{-4}$  M. Time-dependent UV-Vis spectra of **1** in the oxidation of aniline catalytic system, c)  $1.0 \times 10^{-6}$  M, d)  $1.0 \times 10^{-4}$  M.

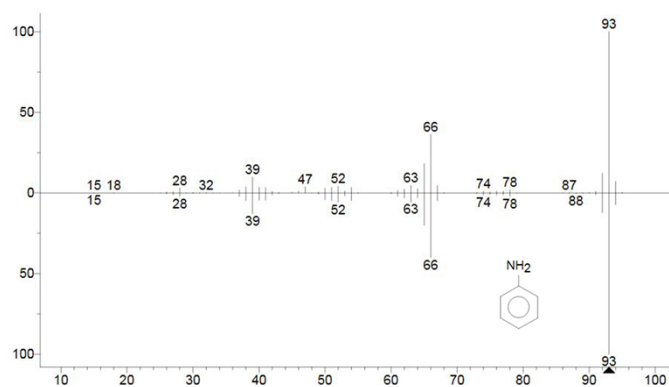

**Fig. S16** The GC-MS spectrum of aniline. (bottom, simulation; top, experiment)

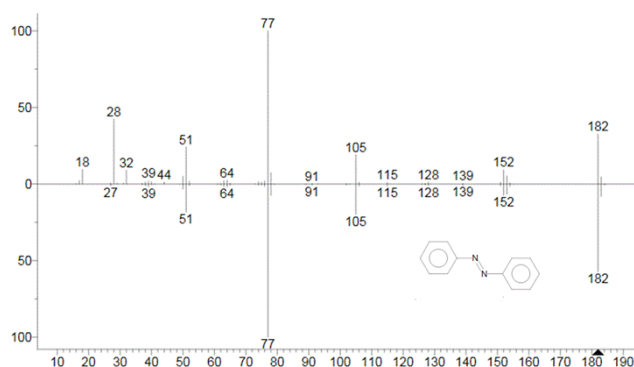

**Fig. S17** The GC-MS spectrum of azobenzene. (bottom, simulation; top, experiment)

#### The mechanism research of nitrobenzene reduction.

There are currently two reaction pathways for the reduction of nitrobenzene to the corresponding aniline: direct and condensation. The direct reaction pathway is the formation of nitrosobenzene from nitrobenzene, followed by N-phenylhydroxylamine, and finally the reduction of N-phenylhydroxylamine to aniline; while the condensation route involves azobenzene intermediates (e.g., azoxybenzene and azobenzene).<sup>21,22</sup> Under visible light irradiation, the valence band (VB) of **1** occurs charge separation and electrons are transferred from the VB to the conduction band (CB), where holes are generated in the VB.<sup>23</sup>  $\text{N}_2\text{H}_4 \cdot \text{H}_2\text{O}$  traps holes and generates protons, while photogenerated electrons may complete the whole photocatalytic cycle by hydrogenating nitrobenzene to produce aniline through different intermediates.<sup>24,25</sup> To clarify the possible mechanism of the nitrobenzene reduction reaction, some experiments were designed. The presence of aniline could be detected by GC-MS under optimized conditions with nitrosobenzene and N-phenylhydroxylamine as substrates (Fig. S16, ESI<sup>†</sup>). And when the intermediate azobenzene in the condensation route was used as a substrate, it showed no aniline. These results suggest that the nitrobenzene can be directly reduced to the corresponding aniline in this catalytic system.

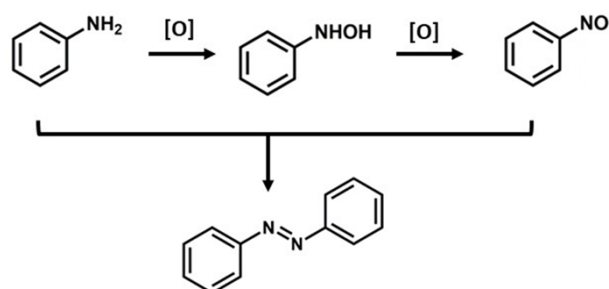

**Scheme S1.** The reaction pathway of aniline oxidation.

The oxidation of aniline is usually considered to proceed by two known mechanisms, namely the nitrosobenzene intermediate mechanism as well as the aniline radical mechanism.<sup>26</sup> In order to gain insight into the aniline oxidation process, several experiments were carried out. Aniline and nitrosobenzene were added to the same catalytic system, resulting in the detection of the azobenzene product (Fig. S17, ESI<sup>†</sup>). In addition, the addition of radical scavenger 6-di-tert-butyl-4-methylphenol (BHT) agent to the substrate aniline had no significant effect on the reaction, indicating that the reaction does not proceed through a radical process (Table 3, entry 9).<sup>27</sup> Therefore, we conclude that the catalytic reaction follows a nitrosobenzene intermediate mechanism.

**Table S1** Crystallographic Data Parameters for **1**.

| compound                                 | <b>1</b>                                                            |
|------------------------------------------|---------------------------------------------------------------------|
| empirical formula                        | C52H56As4Cl4N16Na5.34O146Rh5.66S2W40                                |
| formula weight                           | 11805.96                                                            |
| temperature (K)                          | 296.3                                                               |
| crystal system                           | monoclinic                                                          |
| space group                              | C2/c                                                                |
| <i>a</i> /Å                              | 41.050(5)                                                           |
| <i>b</i> /Å                              | 19.763(2)                                                           |
| <i>c</i> /Å                              | 29.763(4)                                                           |
| $\beta$ /deg                             | 110.885(5)                                                          |
| <i>V</i> /Å <sup>3</sup>                 | 22559(5)                                                            |
| <i>Z</i>                                 | 4                                                                   |
| $\rho_{\text{calc}}$ /g cm <sup>-3</sup> | 3.476                                                               |
| $\mu$ /mm <sup>-1</sup>                  | 21.447                                                              |
| $2\theta$ range/deg                      | 4.374 to 50.2                                                       |
| index ranges                             | -48 ≤ <i>h</i> ≤ 48,<br>-23 ≤ <i>k</i> ≤ 23,<br>-33 ≤ <i>l</i> ≤ 35 |
| Reflections collected                    | 84416                                                               |
| Independent reflections                  | 20002                                                               |
| data/restraints/parameters               | 20002/36/1245                                                       |
| GOF on <i>F</i> <sup>2</sup>             | 1.049                                                               |
| $R_1, {}^a wR_2^b [I > 2\sigma(I)]$      | 0.0402, 0.0987                                                      |
| $R_1, {}^a wR_2^b$ [all data]            | 0.0579, 0.1101                                                      |

$${}^a R_1 = \sum ||F_o| - |F_c|| / \sum |F_o|. \quad {}^b wR_2 = [\sum w(F_o^2 - F_c^2)^2 / \sum w(F_o^2)^2]^{1/2}; \quad w = 1/[\sigma^2(F_o^2) + (xP)^2 + yP]$$

**Table S2** Selected bond distances (Å) for polyanion **1a**.

| Bond    | Length (Å) | Bond    | Length (Å) | Bond    | Length (Å) |
|---------|------------|---------|------------|---------|------------|
| Rh1–As1 | 2.404(17)  | Rh1–N1  | 2.080(10)  | Rh1–O15 | 2.007(9)   |
| Rh1–O20 | 1.995(8)   | Rh1–O24 | 2.013(9)   | Rh1–O37 | 2.016(9)   |
| Rh2–O39 | 2.006(9)   | Rh2–O40 | 1.992(8)   | Rh2–O46 | 2.010(9)   |
| Rh2–O62 | 2.021(8)   | Rh2–As2 | 2.4010(17) | Rh2–N2  | 2.084(11)  |
| Rh3–Cl1 | 2.329(4)   | Rh3–N5  | 2.104(13)  | Rh3–N6  | 2.060(13)  |
| Rh3–Cl1 | 2.329(4)   | Rh3–N5  | 2.104(13)  | Rh3–N6  | 2.060(13)  |
| Rh4–Cl2 | 2.329(6)   | Rh4–N3  | 2.064(13)  | Rh4–N4  | 2.078(15)  |
| Rh4–Cl2 | 2.329(6)   | Rh4–N3  | 2.064(13)  | Rh4–N4  | 2.078(15)  |
| As1–O12 | 1.737(8)   | As1–O14 | 1.751(9)   | As1–O22 | 1.724(8)   |
| As2–O2  | 1.740(8)   | As2–O52 | 1.743(10)  | As2–O53 | 1.712(9)   |
| W1–O2   | 2.282(9)   | W1–O62  | 1.813(8)   | W1–O63  | 1.916(10)  |
| W1–O64  | 1.719(10)  | W1–O65  | 1.968(9)   | W1–O66  | 1.991(10)  |
| W2–O2   | 2.461(9)   | W2–O50  | 1.817(9)   | W2–O58  | 1.952(9)   |
| W2–O65  | 1.920(9)   | W2–O67  | 1.738(10)  | W2–O68  | 2.000(9)   |
| W3–O46  | 1.782(9)   | W3–O50  | 2.020(9)   | W3–O51  | 1.947(9)   |
| W3–O46  | 1.782(9)   | W3–O50  | 2.020(9)   | W3–O51  | 1.947(9)   |
| W4–O38  | 1.723(10)  | W4–O39  | 1.836(9)   | W4–O45  | 1.962(10)  |
| W4–O52  | 2.268(9)   | W4–O61  | 2.009(9)   | W4–O63  | 1.940(9)   |
| W5–O1   | 1.722(11)  | W5–O41  | 1.797(10)  | W5–O43  | 1.936(9)   |
| W5–O45  | 1.898(10)  | W5–O52  | 2.477(9)   | W5–O54  | 1.977(9)   |

**Table S3** Selected bond angle (°) for polyanion **1a**.

| Bond        | Angle (°) | Bond        | Angle (°) | Bond        | Angle (°) |
|-------------|-----------|-------------|-----------|-------------|-----------|
| N1–Rh1–As1  | 174.4(3)  | O15–Rh1–As1 | 84.6(3)   | O15–Rh1–N1  | 92.2(4)   |
| O15–Rh1–O24 | 176.6(4)  | O15–Rh1–O37 | 83.4(4)   | O20–Rh1–As1 | 99.2(3)   |
| O20–Rh1–N1  | 85.7(4)   | O20–Rh1–O15 | 96.0(4)   | O20–Rh1–O24 | 83.5(4)   |
| O24–Rh1–As1 | 98.7(2)   | O24–Rh1–N1  | 84.5(4)   | O37–Rh1–As1 | 84.9(3)   |
| O39–Rh2–As2 | 173.7(3)  | O39–Rh2–N2  | 90.0(4)   | O39–Rh2–O46 | 176.8(4)  |
| N2–Rh2–As2  | 173.7(3)  | O39–Rh2–O62 | 84.5(4)   | O40–Rh2–As2 | 98.4(3)   |
| O40–Rh2–N2  | 85.9(4)   | O40–Rh2–O46 | 83.9(4)   | O40–Rh2–O62 | 177.1(4)  |
| O46–Rh2–As2 | 98.2(3)   | O46–Rh2–N2  | 86.8(4)   | O46–Rh2–O62 | 95.3(4)   |
| N5–Rh3–Cl1  | 90.3(4)   | N6–Rh3–Cl1  | 88.9(4)   | N6–Rh3–N5   | 84.1(5)   |
| N6–Rh3–N6   | 180       | Cl2–Rh4–Cl2 | 180.0(3)  | N3–Rh4–Cl2  | 91.0(4)   |
| N3–Rh4–N3   | 180       | N4–Rh4–Cl2  | 91.8(5)   | N3–Rh4–Cl2  | 89.0(4)   |
| O12–As1–O14 | 104.9(4)  | O12–As1–Rh1 | 105.4(3)  | O14–As1–Rh1 | 105.7(3)  |
| O22–As1–O12 | 99.3(4)   | O22–As1–O14 | 99.4(4)   | O22–As1–Rh1 | 138.6(3)  |
| O2–As2–O52  | 104.4(4)  | O2–As2–Rh2  | 105.9(3)  | O52–As2–Rh2 | 105.5(3)  |
| O53–As2–O2  | 98.3(4)   | O53–As2–O52 | 99.8(5)   | O53–As2–Rh2 | 138.9(3)  |

**Table S4** Bond valence sum (BVS) calculations of Rh, As, W and O atoms in **1a**.

| Atom | BVS   | Atom | BVS   | Atom | BVS   | Atom | BVS   |
|------|-------|------|-------|------|-------|------|-------|
| Rh1  | 3.646 | Rh2  | 3.652 | Rh3  | 2.994 | Rh4  | 2.994 |
| As1  | 2.539 | As2  | 2.586 | W1   | 6.098 | W2   | 5.863 |
| W3   | 6.239 | W4   | 5.926 | W5   | 6.150 | W6   | 6.121 |
| W7   | 6.076 | W8   | 6.047 | W9   | 6.134 | W10  | 6.044 |
| W11  | 6.125 | W12  | 6.034 | W13  | 6.231 | W14  | 5.993 |
| W15  | 5.891 | W16  | 6.152 | W17  | 5.949 | W18  | 6.257 |
| W19  | 6.161 | W20  | 6.009 | W21  | 6.228 | O1   | 1.694 |
| O2   | 2.028 | O3   | 1.745 | O4   | 1.878 | O5   | 1.788 |
| O6   | 1.976 | O7   | 1.953 | O8   | 1.685 | O9   | 1.824 |
| O10  | 1.658 | O11  | 1.963 | O12  | 2.028 | O13  | 1.978 |
| O14  | 2.014 | O15  | 1.871 | O16  | 1.917 | O17  | 1.909 |
| O18  | 2.072 | O19  | 1.980 | O20  | 1.904 | O21  | 1.948 |
| O22  | 2.054 | O23  | 1.967 | O24  | 1.984 | O25  | 1.991 |
| O26  | 1.953 | O27  | 1.769 | O28  | 1.948 | O29  | 1.822 |
| O30  | 1.778 | O31  | 2.061 | O32  | 1.878 | O33  | 1.689 |
| O34  | 1.986 | O35  | 1.868 | O36  | 1.689 | O37  | 1.868 |
| O38  | 1.689 | O39  | 2.031 | O40  | 2.185 | O41  | 2.079 |
| O42  | 1.955 | O43  | 1.989 | O44  | 1.793 | O45  | 1.938 |
| O46  | 1.997 | O47  | 1.822 | O48  | 1.898 | O49  | 2.035 |
| O50  | 2.067 | O51  | 1.969 | O52  | 2.023 | O53  | 2.072 |
| O54  | 1.944 | O55  | 1.941 | O56  | 1.996 | O57  | 1.803 |
| O58  | 1.943 | O59  | 1.717 | O60  | 2.011 | O61  | 1.835 |
| O62  | 1.865 | O63  | 1.942 | O64  | 1.708 | O65  | 1.863 |
| O66  | 1.869 | O67  | 1.622 | O68  | 1.889 | O69  | 1.722 |
| O70  | 2.060 |      |       |      |       |      |       |

**Table S5** Optimization of **1** for reduction of nitrobenzene to aniline **2a** <sup>a</sup>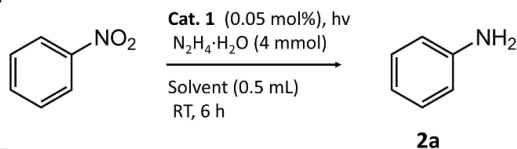

| Entry          | Catalyst (mol%) | Solvent                         | Yield <b>2a</b> (%) <sup>b</sup> |
|----------------|-----------------|---------------------------------|----------------------------------|
| <b>1</b>       | <b>0.05</b>     | <b>methanol</b>                 | <b>96.2</b>                      |
| 2              | 0.05            | CH <sub>3</sub> CN              | 60.7                             |
| 3              | 0.05            | isopropyl alcohol               | 46.8                             |
| 4              | 0.05            | CH <sub>2</sub> Cl <sub>2</sub> | 67.8                             |
| 5              | 0.025           | methanol                        | 74.6                             |
| 6              | 0.10            | methanol                        | 91.9                             |
| 7 <sup>c</sup> | 0.05            | methanol                        | 92.8                             |

<sup>a</sup> **1** (0.05 mol%), substrate (0.5 mmol), methanol (0.5 mL), N<sub>2</sub>H<sub>4</sub>·H<sub>2</sub>O (4 mmol), N<sub>2</sub> (1 atm), 10 W LED lamp, RT, 6 h.

<sup>b</sup> Determined by GC analysis. <sup>c</sup> t=12 h.

**Table S6** Effect of the amount of catalyst and additive on the yields of azobenzene **3a**<sup>a</sup>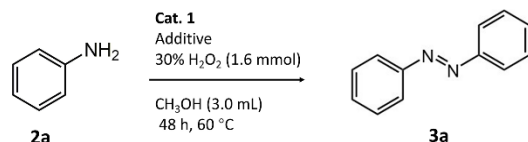

| Entry     | Catalyst (mol%) | Additive (mmol)                                        | Yield <b>3a</b> (%) <sup>b</sup> |
|-----------|-----------------|--------------------------------------------------------|----------------------------------|
| 1         | 0.05            | –                                                      | 67.5                             |
| 2         | 0.05            | K <sub>2</sub> CO <sub>3</sub> (0.08)                  | Trace                            |
| 3         | 0.05            | NaHCO <sub>3</sub> (0.08)                              | 46.2                             |
| 4         | 0.05            | K <sub>3</sub> PO <sub>4</sub> (0.08)                  | Trace                            |
| 5         | 0.05            | As <sub>2</sub> O <sub>3</sub> (0.08)                  | 55.8                             |
| 6         | 0.05            | NaAsO <sub>2</sub> (0.08)                              | 67.8                             |
| 7         | 0.05            | Na <sub>2</sub> HAsO <sub>4</sub> (0.08)               | 50.0                             |
| 8         | 0.05            | Na <sub>2</sub> SO <sub>3</sub> (0.08)                 | 44.6                             |
| 9         | 0.05            | Na <sub>2</sub> SO <sub>4</sub> (0.08)                 | 38.6                             |
| 10        | 0.05            | Na <sub>2</sub> S <sub>2</sub> O <sub>4</sub> (0.08)   | 26.5                             |
| <b>11</b> | <b>0.05</b>     | <b>Na<sub>2</sub>S<sub>2</sub>O<sub>8</sub> (0.08)</b> | <b>94.7</b>                      |
| 12        | 0.05            | Na <sub>2</sub> S <sub>2</sub> O <sub>8</sub> (0.04)   | 85.1                             |
| 13        | 0.05            | Na <sub>2</sub> S <sub>2</sub> O <sub>8</sub> (0.16)   | 89.9                             |
| 14        | 0.03            | Na <sub>2</sub> S <sub>2</sub> O <sub>8</sub> (0.08)   | 83.7                             |
| 15        | 0.01            | Na <sub>2</sub> S <sub>2</sub> O <sub>8</sub> (0.08)   | 72.2                             |

<sup>a</sup> **1** (0.05 mol%), substrate (1.0 mmol), methanol (3.0 mL), 30% H<sub>2</sub>O<sub>2</sub> (1.6 mmol), Na<sub>2</sub>S<sub>2</sub>O<sub>8</sub> (0.08 mmol), 60 °C, 48 h.

<sup>b</sup> Yields determined by GC analysis.

**Table S7** Effect of temperature, solvent and time on the yields of azobenzene **3a**<sup>a</sup>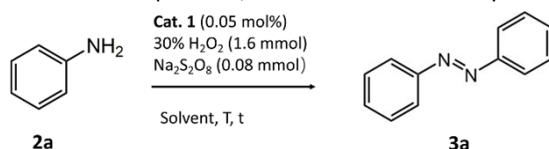

| Entry    | T (°C)    | Solvent (3.0 mL)                   | Time (h)  | Yield <b>3a</b> (%) <sup>b</sup> |
|----------|-----------|------------------------------------|-----------|----------------------------------|
| 1        | RT        | CH <sub>3</sub> OH                 | 48        | 71.4                             |
| 2        | 50        | CH <sub>3</sub> OH                 | 48        | 84.1                             |
| <b>3</b> | <b>60</b> | <b>CH<sub>3</sub>OH</b>            | <b>48</b> | <b>94.7</b>                      |
| 4        | 70        | CH <sub>3</sub> OH                 | 48        | 90.3                             |
| 5        | 60        | H <sub>2</sub> O                   | 48        | Trace                            |
| 6        | 60        | CH <sub>3</sub> CN                 | 48        | 69.7                             |
| 7        | 60        | DMF                                | 48        | 17.1                             |
| 8        | 60        | CH <sub>2</sub> Cl <sub>2</sub>    | 48        | 45.3                             |
| 9        | 60        | MTBE                               | 48        | 42.7                             |
| 10       | 60        | CH <sub>3</sub> CH <sub>2</sub> OH | 48        | 40.5                             |
| 11       | 60        | CH <sub>3</sub> OH                 | 36        | 87.9                             |
| 12       | 60        | CH <sub>3</sub> OH                 | 24        | 79.4                             |

<sup>a</sup> **1** (0.05 mol%), substrate (1.0 mmol), 30% H<sub>2</sub>O<sub>2</sub> (1.6 mmol), Na<sub>2</sub>S<sub>2</sub>O<sub>8</sub> (0.08 mmol), 60 °C, 48 h. <sup>b</sup> Yields determined by GC analysis.

**Table S8** Catalytic oxidation of aniline derivatives to azobenzenes by **1**<sup>a, b</sup>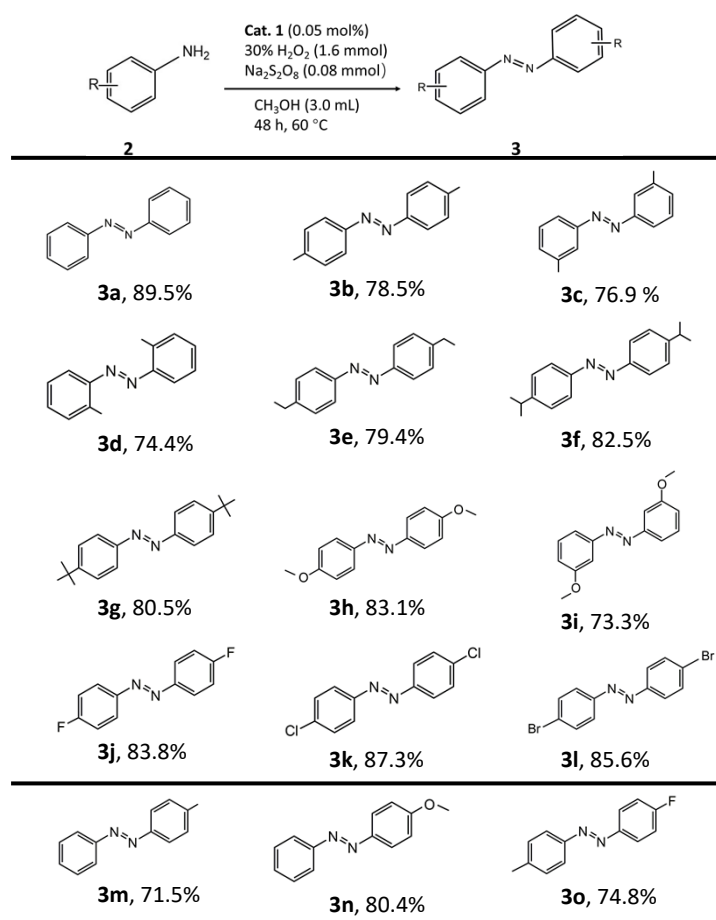

<sup>a</sup> **1** (0.05 mol%), substrate (1.0 mmol), methanol (3.0 mL), 30% H<sub>2</sub>O<sub>2</sub> (1.6 mmol), Na<sub>2</sub>S<sub>2</sub>O<sub>8</sub> (0.08 mmol), 60 °C, 48 h. <sup>b</sup> isolated yields.

**Table S9** Summary of the yield of the reduction of nitrobenzene with different catalysts.

| Entry | Catalyst                                                                                                                                                                                                                                                                                                                                                                                                                         | Temperature/°C | Light source    | Hydrogen source                                 | Time/h | Yield/% | Ref.      |
|-------|----------------------------------------------------------------------------------------------------------------------------------------------------------------------------------------------------------------------------------------------------------------------------------------------------------------------------------------------------------------------------------------------------------------------------------|----------------|-----------------|-------------------------------------------------|--------|---------|-----------|
| 1     | Na <sub>5</sub> H <sub>5.68</sub> [NA <sub>0.17</sub> Rh <sub>0.83</sub> <sup>III</sup> (C <sub>6</sub> H <sub>8</sub> N <sub>2</sub> ) <sub>2</sub> Cl <sub>2</sub> ] <sub>2</sub> (C <sub>8</sub> H <sub>8</sub> N <sub>2</sub> ) <sub>2</sub> [As <sub>4</sub> W <sub>40</sub> O <sub>140</sub> Rh <sub>4</sub> <sup>IV</sup> (C <sub>6</sub> H <sub>4</sub> N <sub>2</sub> S) <sub>2</sub> ] <sub>2</sub> ·nH <sub>2</sub> O | RT             | Visible light   | N <sub>2</sub> H <sub>4</sub> ·H <sub>2</sub> O | 6      | 96      | this work |
| 2     | CoW-TPT                                                                                                                                                                                                                                                                                                                                                                                                                          | RT             | 365 nm          | TEOA                                            | 12     | 95      | S28       |
| 3     | Pd/C                                                                                                                                                                                                                                                                                                                                                                                                                             | 80             | /               | N <sub>2</sub> H <sub>4</sub> ·H <sub>2</sub> O | 4      | 100     | S29       |
| 4     | Pd-Au NRs                                                                                                                                                                                                                                                                                                                                                                                                                        | 25             | λ > 320 nm      | HCOOH/HCOONa                                    | 5      | >99     | S30       |
| 5     | PbBiO <sub>2</sub> Br                                                                                                                                                                                                                                                                                                                                                                                                            | RT             | 440 nm          | TEOA                                            | 6      | >99     | S31       |
| 6     | Zr <sub>12</sub> -TPDC-Co                                                                                                                                                                                                                                                                                                                                                                                                        | 110            | /               | NaBEt <sub>3</sub> H/H <sub>2</sub>             | 72     | 100     | S32       |
| 7     | Cu-CoFe <sub>2</sub> O <sub>4</sub>                                                                                                                                                                                                                                                                                                                                                                                              | RT             | Visible light   | H <sub>2</sub> O                                | 1.5    | 99      | S33       |
| 8     | NC-90                                                                                                                                                                                                                                                                                                                                                                                                                            | 90             | /               | N <sub>2</sub> H <sub>4</sub> ·H <sub>2</sub> O | 1      | 100     | S34       |
| 9     | MMC-Fe <sub>2</sub> O <sub>3</sub>                                                                                                                                                                                                                                                                                                                                                                                               | 80             | /               | N <sub>2</sub> H <sub>4</sub> ·H <sub>2</sub> O | 2      | 100     | S35       |
| 10    | Rh-Fe <sub>2</sub> O <sub>3</sub>                                                                                                                                                                                                                                                                                                                                                                                                | 80             | /               | N <sub>2</sub> H <sub>4</sub> ·H <sub>2</sub> O | 1      | 99      | S36       |
| 11    | Ag-rGO/g-C <sub>3</sub> N <sub>4</sub>                                                                                                                                                                                                                                                                                                                                                                                           | TR             | λ > 400 nm      | methanol                                        | 4      | 98      | S23       |
| 12    | 3.0 wt% CQDs/ZnIn <sub>2</sub> S <sub>4</sub>                                                                                                                                                                                                                                                                                                                                                                                    | /              | LED irradiation | TEOA/MeOH (1:1)                                 | 16     | >99     | S35       |
| 13    | EY                                                                                                                                                                                                                                                                                                                                                                                                                               | RT             | LED (525)       | TEOA                                            | 24     | >99     | S37       |

|    |                             |    |     |   |                                                 |     |       |     |
|----|-----------------------------|----|-----|---|-------------------------------------------------|-----|-------|-----|
| 14 | Co@CN/SiO <sub>2</sub> -500 | 70 | nm) | / | N <sub>2</sub> H <sub>4</sub> ·H <sub>2</sub> O | 1.2 | >99.5 | S21 |
|----|-----------------------------|----|-----|---|-------------------------------------------------|-----|-------|-----|

**Table S10** Summary of the yield of the oxidation of aniline to azobenzene with different catalysts.

| Entry | Catalyst                                                                                                                                                                                                                                                                                                                                                                                                                       | Temperature/°C | oxidant                       | Additive                                      | Solvent     | Time/h | Yield/% | Ref.      |
|-------|--------------------------------------------------------------------------------------------------------------------------------------------------------------------------------------------------------------------------------------------------------------------------------------------------------------------------------------------------------------------------------------------------------------------------------|----------------|-------------------------------|-----------------------------------------------|-------------|--------|---------|-----------|
| 1     | Na <sub>5</sub> H <sub>5.68</sub> [Na <sub>0.17</sub> Rh <sub>0.83</sub> <sup>III</sup> (C <sub>6</sub> H <sub>8</sub> N <sub>2</sub> ) <sub>2</sub> Cl <sub>2</sub> ] <sub>2</sub> (C <sub>8</sub> H <sub>8</sub> N <sub>2</sub> ) <sub>2</sub> [As <sub>4</sub> W <sub>40</sub> O <sub>14</sub> <sub>0</sub> Rh <sub>4</sub> <sup>IV</sup> (C <sub>6</sub> H <sub>4</sub> N <sub>2</sub> S) <sub>2</sub> ]·nH <sub>2</sub> O | 60             | H <sub>2</sub> O <sub>2</sub> | Na <sub>2</sub> S <sub>2</sub> O <sub>8</sub> | methanol    | 48     | 95      | this work |
| 2     | [N(C <sub>4</sub> H <sub>9</sub> ) <sub>4</sub> ] <sub>2</sub> [Mo <sub>6</sub> O <sub>19</sub> ]                                                                                                                                                                                                                                                                                                                              | 60             | H <sub>2</sub> O <sub>2</sub> | Na <sub>2</sub> S <sub>2</sub> O <sub>3</sub> | methanol    | 24     | 99      | S27       |
| 3     | Zr(OH) <sub>4</sub>                                                                                                                                                                                                                                                                                                                                                                                                            | 40             | TBHP                          | /                                             | acetic acid | 24     | 90      | S37       |
| 4     | CuBr                                                                                                                                                                                                                                                                                                                                                                                                                           | 60             | air                           | pyridine                                      | toluene     | 20     | 96      | S38       |
| 5     | meso-Mn <sub>2</sub> O <sub>3</sub>                                                                                                                                                                                                                                                                                                                                                                                            | 110            | air balloon                   | /                                             | toluene     | 8      | >99     | S39       |
| 6     | 1.5% Au/TiO <sub>2</sub>                                                                                                                                                                                                                                                                                                                                                                                                       | 100            | O <sub>2</sub>                | /                                             | toluene     | 22     | 99      | S40       |
| 7     | RuO <sub>2</sub> /Cu <sub>2</sub> O NPs                                                                                                                                                                                                                                                                                                                                                                                        | 85             | open atmosphere               | /                                             | MeCN        | 16     | 94      | S41       |
| 8     | Ag/C                                                                                                                                                                                                                                                                                                                                                                                                                           | 60             | air                           | /                                             | DMSO        | 24     | 97      | S42       |
| 9     | Au <sub>1</sub> Pd <sub>3</sub> @C                                                                                                                                                                                                                                                                                                                                                                                             | 333 K          | O <sub>2</sub> balloon        | /                                             | DMSO        | 12     | 97      | S43       |

**Table S11** Assignment of peaks in negative mode mass spectra of after catalysis of 1.

| formula                                                                                                                                                                                                         | m/z value |             | Simulation of peaks                                                                   |
|-----------------------------------------------------------------------------------------------------------------------------------------------------------------------------------------------------------------|-----------|-------------|---------------------------------------------------------------------------------------|
|                                                                                                                                                                                                                 | Observed  | Theoretical |                                                                                       |
| {Na <sub>5</sub> AsW <sub>40</sub> O <sub>140</sub> Rh <sub>4</sub> <sup>IV</sup> (C <sub>6</sub> H <sub>4</sub> N <sub>2</sub> S) <sub>2</sub> (H <sub>2</sub> O) <sub>14</sub> } <sup>7-</sup>                | 1531.93   | 1531.38     | 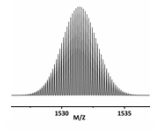 |
| {Na <sub>2</sub> H <sub>4</sub> AsW <sub>40</sub> O <sub>140</sub> Rh <sub>4</sub> <sup>IV</sup> (C <sub>6</sub> H <sub>4</sub> N <sub>2</sub> S) <sub>2</sub> (H <sub>2</sub> O) <sub>24</sub> } <sup>6-</sup> | 1805.92   | 1805.81     |  |
| {Na <sub>2</sub> H <sub>4</sub> AsW <sub>40</sub> O <sub>140</sub> Rh <sub>4</sub> <sup>IV</sup> (C <sub>6</sub> H <sub>4</sub> N <sub>2</sub> S) <sub>2</sub> (H <sub>2</sub> O) <sub>36</sub> } <sup>6-</sup> | 1841.89   | 1841.84     |  |
| {Na <sub>5</sub> H <sub>2</sub> AsW <sub>40</sub> O <sub>140</sub> Rh <sub>4</sub> <sup>IV</sup> (C <sub>6</sub> H <sub>4</sub> N <sub>2</sub> S) <sub>2</sub> (H <sub>2</sub> O) <sub>35</sub> } <sup>5-</sup> | 2220.07   | 2220.00     |  |
| {Na <sub>2</sub> H <sub>5</sub> AsW <sub>40</sub> O <sub>140</sub> Rh <sub>4</sub> <sup>IV</sup> (C <sub>6</sub> H <sub>4</sub> N <sub>2</sub> S) <sub>2</sub> (H <sub>2</sub> O) <sub>56</sub> } <sup>5-</sup> | 2282.06   | 2282.47     |  |



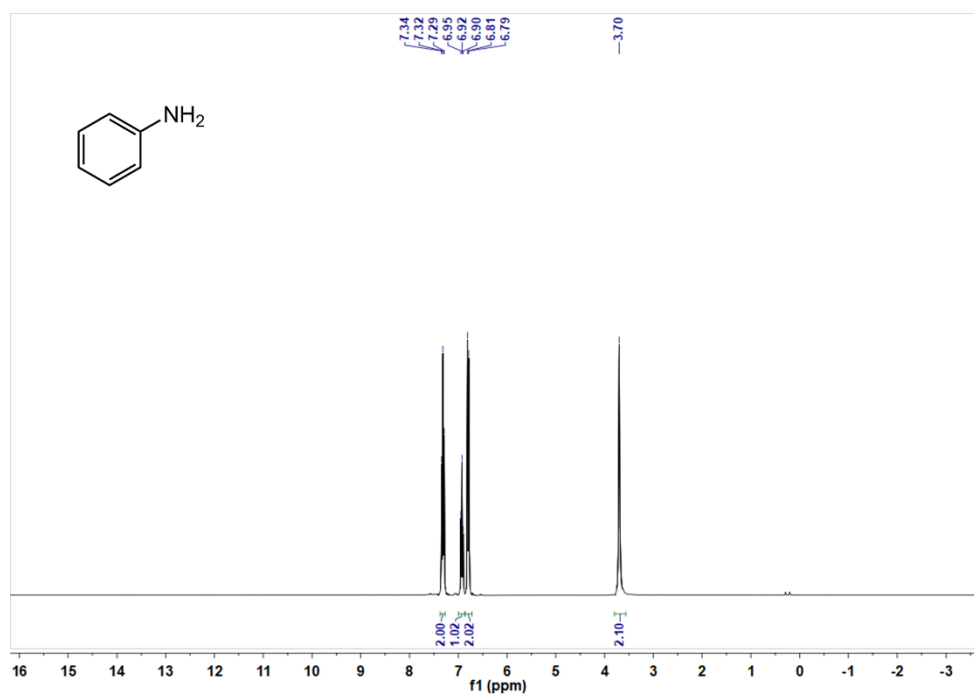

**Fig. S18**  $^1\text{H}$  NMR spectra of **2a** (500 MHz,  $\text{CDCl}_3$ ).

**Aniline(2a):**  $^1\text{H}$  NMR (500 MHz,  $\text{CDCl}_3$ )  $\delta$  7.32 (t,  $J = 7.8$  Hz, 2H), 6.92 (t,  $J = 7.3$  Hz, 1H), 6.80 (d,  $J = 7.5$  Hz, 2H), 3.70 (s, 2H).

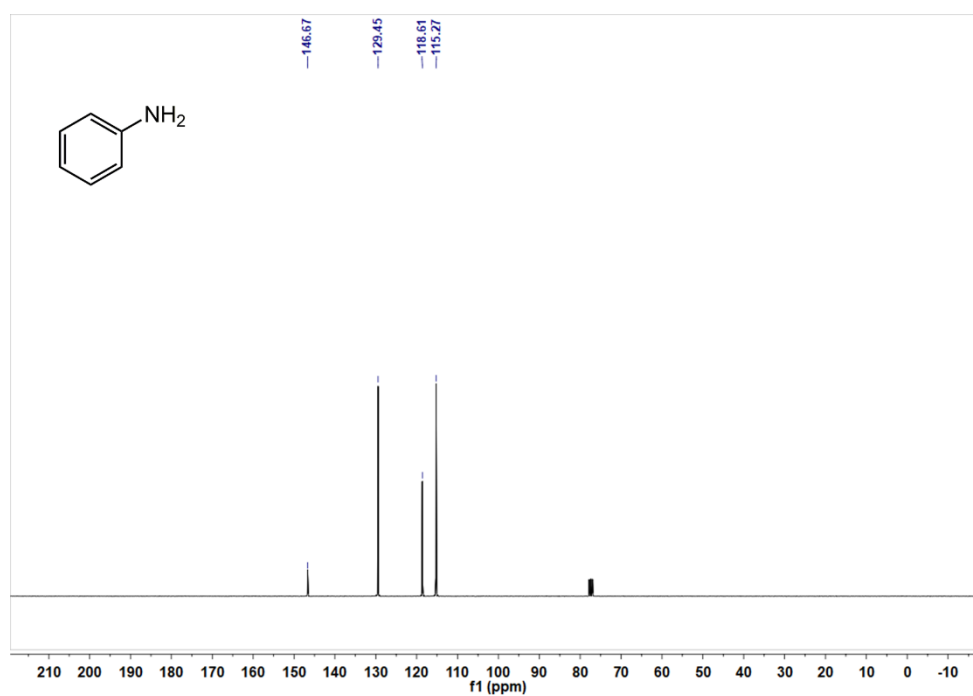

**Fig. S19**  $^{13}\text{C}$  NMR spectra of **2a** (126 MHz,  $\text{CDCl}_3$ ).

**Aniline(2a):**  $^{13}\text{C}$  NMR (126 MHz,  $\text{CDCl}_3$ )  $\delta$  146.67 (s), 129.45 (s), 118.61 (s), 115.27 (s).

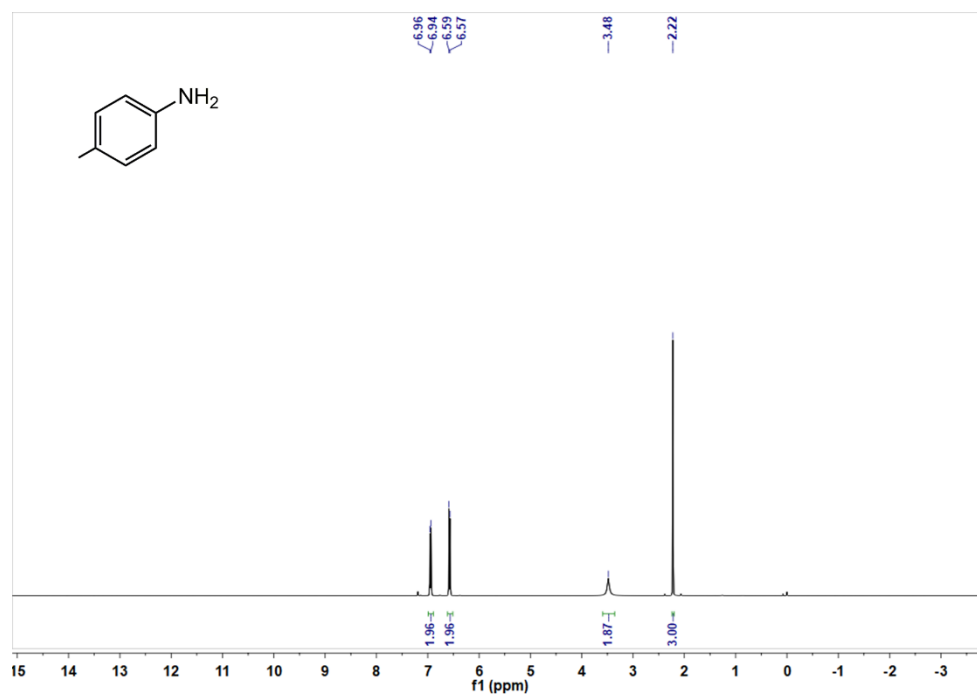

**Fig. S20**  $^1\text{H}$  NMR spectra of **2b** (500 MHz,  $\text{CDCl}_3$ ).

**p-Toluidine (2b):**  $^1\text{H}$  NMR (500 MHz,  $\text{CDCl}_3$ )  $\delta$  6.95 (d,  $J = 8.0$  Hz, 2H), 6.58 (d,  $J = 8.3$  Hz, 2H), 3.48 (s, 2H), 2.22 (s, 3H).

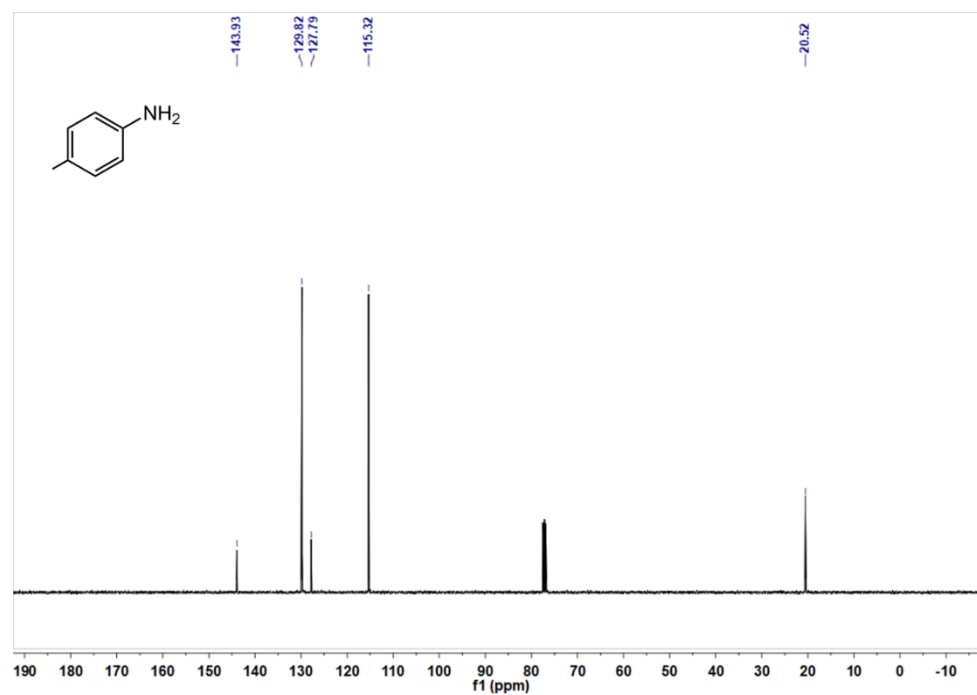

**Fig. S21**  $^{13}\text{C}$  NMR spectra of **2b** (126 MHz,  $\text{CDCl}_3$ ).

**p-Toluidine (2b):**  $^{13}\text{C}$  NMR (126 MHz,  $\text{CDCl}_3$ )  $\delta$  143.93 (s), 129.82 (s), 127.79 (s), 115.32 (s), 20.52 (s).

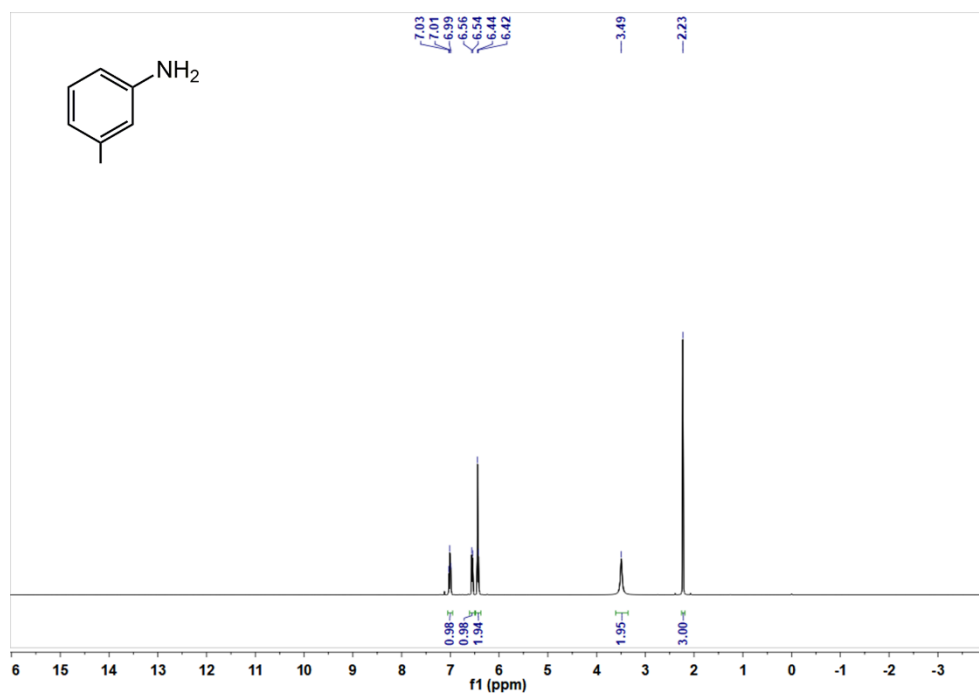

Fig. S22  $^1\text{H}$  NMR spectra of **2c** (500 MHz,  $\text{CDCl}_3$ ).

**m-Toluidine (2c):**  $^1\text{H}$  NMR (500 MHz,  $\text{CDCl}_3$ )  $\delta$  7.01 (t,  $J = 7.4$  Hz, 1H), 6.55 (d,  $J = 7.3$  Hz, 1H), 6.43 (d,  $J = 7.4$  Hz, 2H), 3.49 (s, 2H), 2.23 (s, 3H).

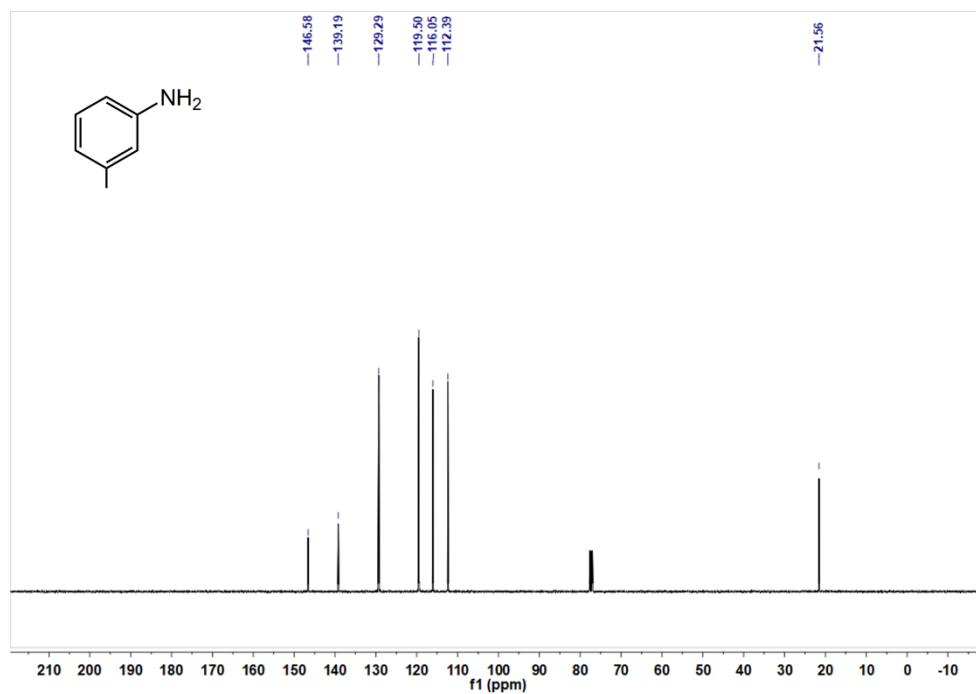

**Fig. S23**  $^{13}\text{C}$  NMR spectra of **2c** (126 MHz,  $\text{CDCl}_3$ ).

**m-Toluidine (2c):**  $^{13}\text{C}$  NMR (126 MHz,  $\text{CDCl}_3$ )  $\delta$  146.58 (s), 139.19 (s), 129.29 (s), 119.50 (s), 116.05 (s), 112.39 (s), 21.56 (s).

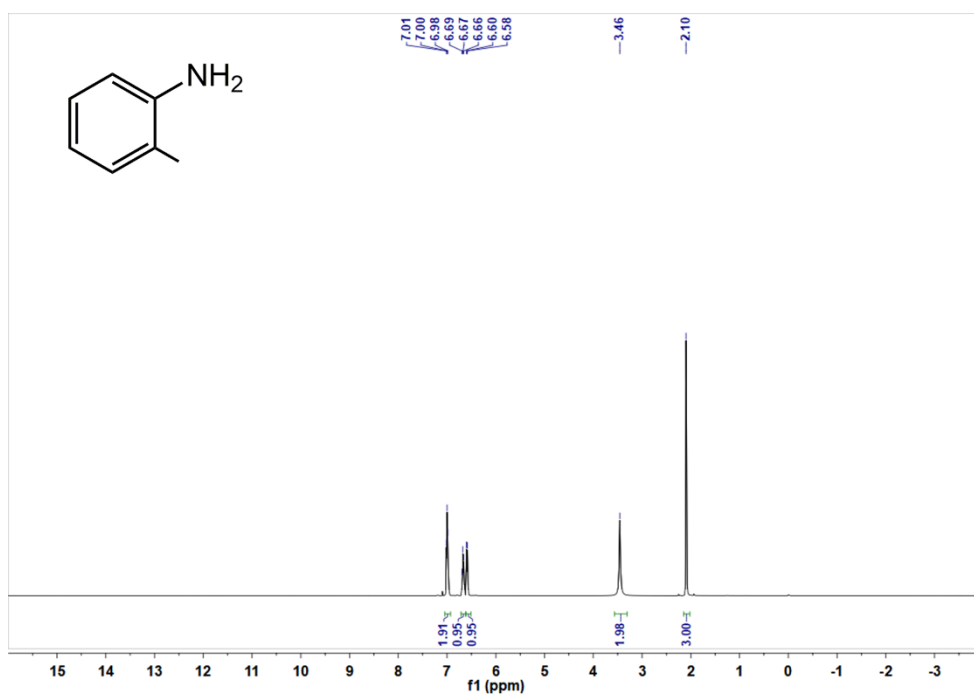

**Fig. S24**  $^1\text{H}$  NMR spectra of **2d** (500 MHz,  $\text{CDCl}_3$ ).

**o-Toluidine (2d):**  $^1\text{H}$  NMR (500 MHz,  $\text{CDCl}_3$ )  $\delta$  7.00 (t,  $J = 6.0$  Hz, 2H), 6.68 (t,  $J = 6.7$  Hz, 1H), 6.59 (d,  $J = 8.1$  Hz, 1H), 3.46 (s, 2H), 2.10 (s, 3H).

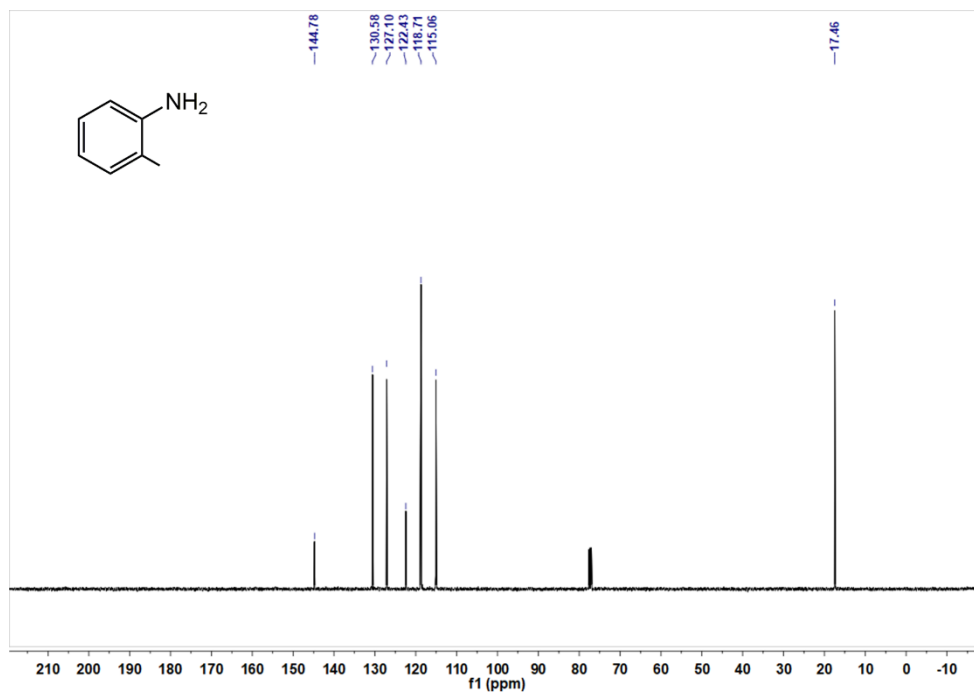

**Fig. S25**  $^{13}\text{C}$  NMR spectra of **2d** (126 MHz,  $\text{CDCl}_3$ ).

**o-Toluidine (2d):**  $^{13}\text{C}$  NMR (126 MHz,  $\text{CDCl}_3$ )  $\delta$  144.78 (s), 130.58 (s), 127.10 (s), 122.43 (s), 118.71 (s), 115.06 (s), 17.46 (s).

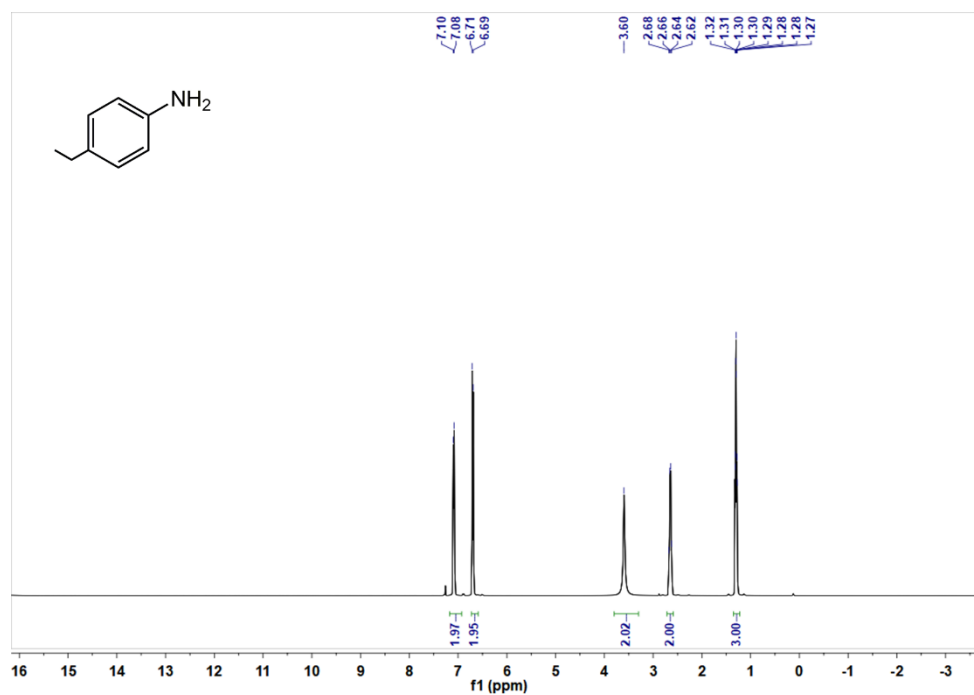

**Fig. S26**  $^1\text{H}$  NMR spectra of **2e** (500 MHz,  $\text{CDCl}_3$ ).

**4-Ethylaniline (2e):**  $^1\text{H}$  NMR (500 MHz,  $\text{CDCl}_3$ )  $\delta$  7.09 (d,  $J$  = 8.3 Hz, 2H), 6.70 (d,  $J$  = 8.3 Hz, 2H), 3.60 (s, 2H), 2.65 (q,  $J$  = 7.5 Hz, 2H), 1.29 (ddd,  $J$  = 7.6, 4.9, 2.1 Hz, 3H).

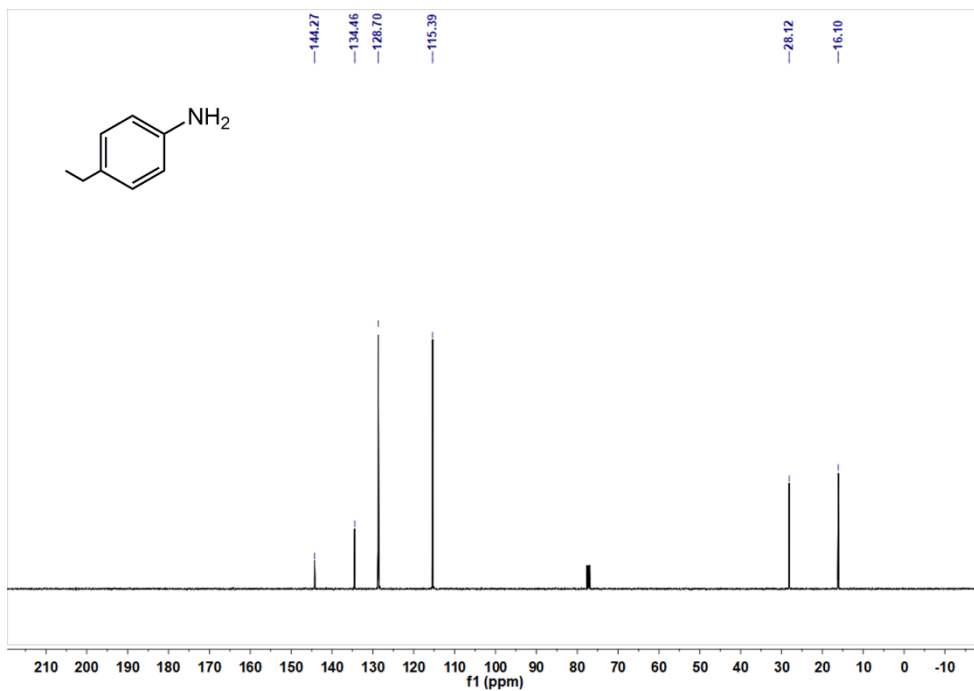

Fig. S27  $^{13}\text{C}$  NMR spectra of **2e** (126 MHz,  $\text{CDCl}_3$ ).

**4-Ethylaniline (2e)**:  $^{13}\text{C}$  NMR (126 MHz,  $\text{CDCl}_3$ )  $\delta$  144.27 (s), 134.46 (s), 128.70 (s), 115.39 (s), 28.12 (s), 16.10 (s).

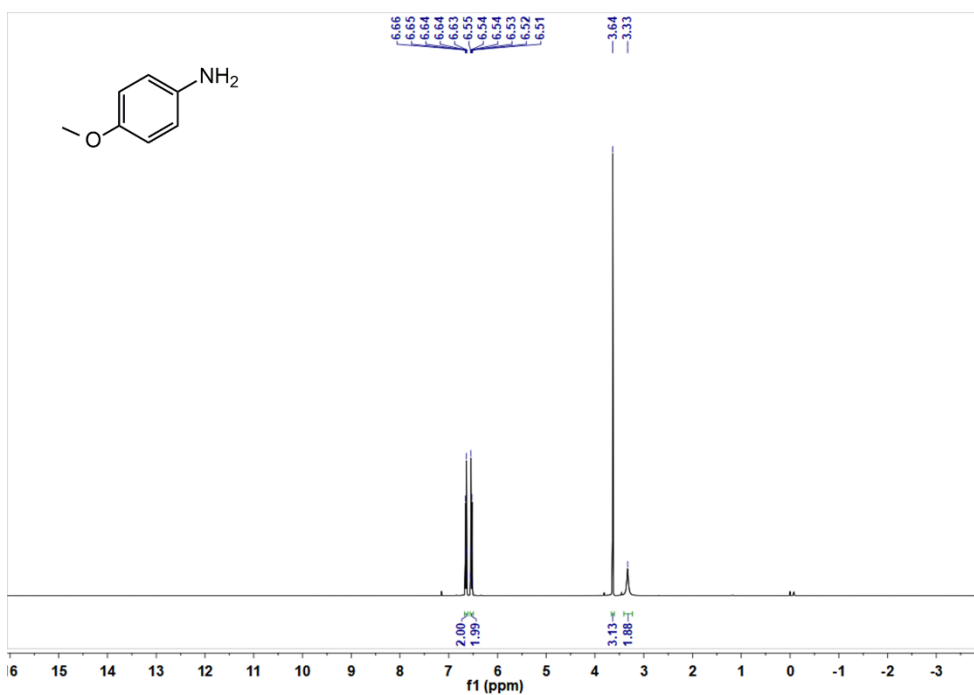

Fig. S28  $^1\text{H}$  NMR spectra of **2f** (500 MHz,  $\text{CDCl}_3$ ).

**p-Anisidine (2f)**:  $^1\text{H}$  NMR (500 MHz,  $\text{CDCl}_3$ )  $\delta$  6.68 – 6.61 (m, 2H), 6.56 – 6.50 (m, 2H), 3.64 (s, 3H), 3.33 (s, 2H).

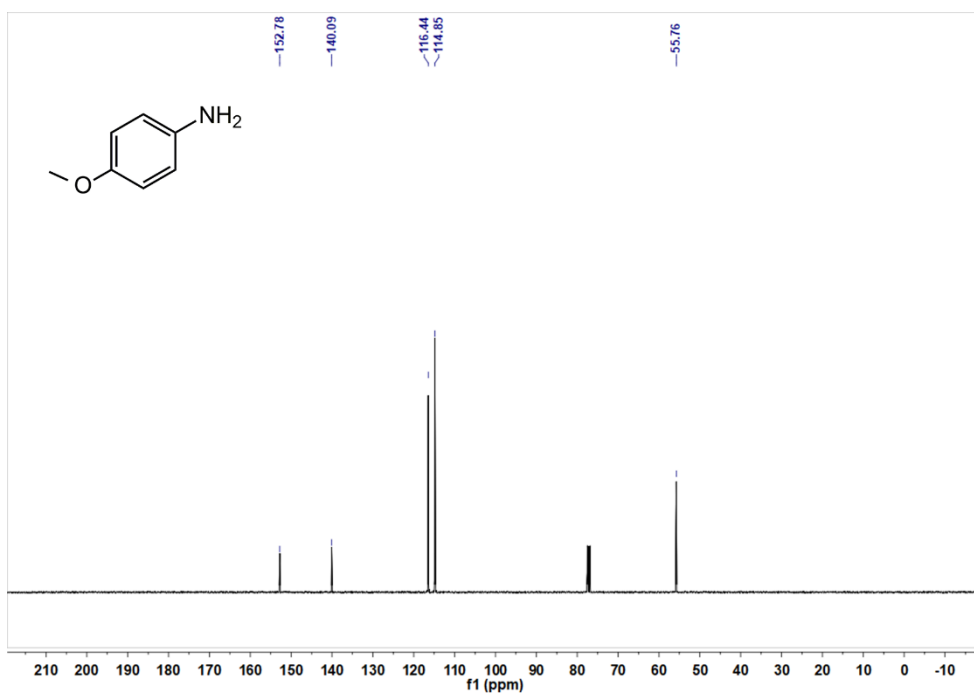

**Fig. S29**  $^{13}\text{C}$  NMR spectra of **2f** (126 MHz,  $\text{CDCl}_3$ ).  
**p-Anisidine (2f):**  $^{13}\text{C}$  NMR (126 MHz,  $\text{CDCl}_3$ )  $\delta$  152.78 (s), 140.09 (s), 116.44 (s), 114.85 (s), 55.76 (s).

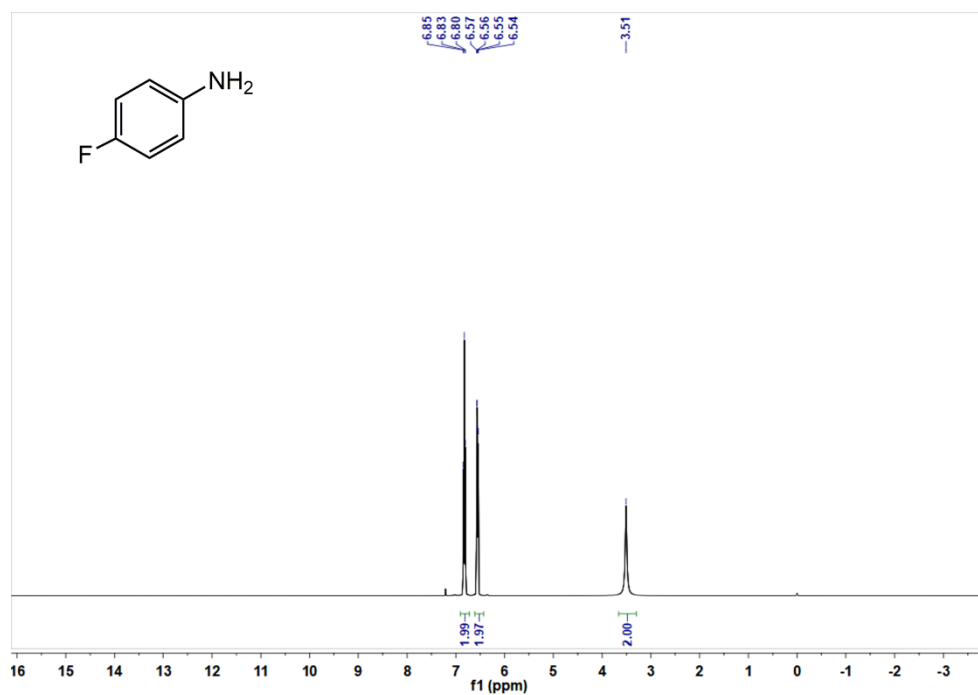

**Fig. S30**  $^1\text{H}$  NMR spectra of **2g** (500 MHz,  $\text{CDCl}_3$ ).  
**4-Fluoroaniline (2g):**  $^1\text{H}$  NMR (500 MHz,  $\text{CDCl}_3$ )  $\delta$  6.83 (t,  $J = 8.7$  Hz, 2H), 6.56 (dd,  $J = 8.9, 4.5$  Hz, 2H), 3.51 (s, 2H).

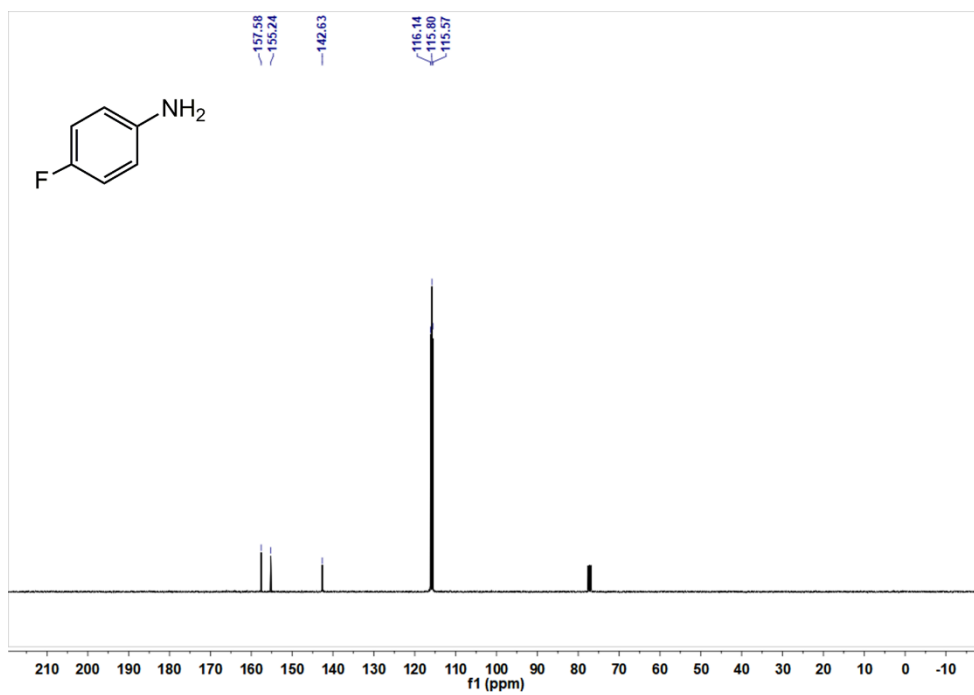

**Fig. S31**  $^{13}\text{C}$  NMR spectra of **2g** (126 MHz,  $\text{CDCl}_3$ ).

**4-Fluoroaniline (2g):**  $^{13}\text{C}$  NMR (126 MHz,  $\text{CDCl}_3$ )  $\delta$  157.58 (s), 155.24 (s), 142.63 (s), 116.14 (s), 115.80 (s), 115.57 (s).



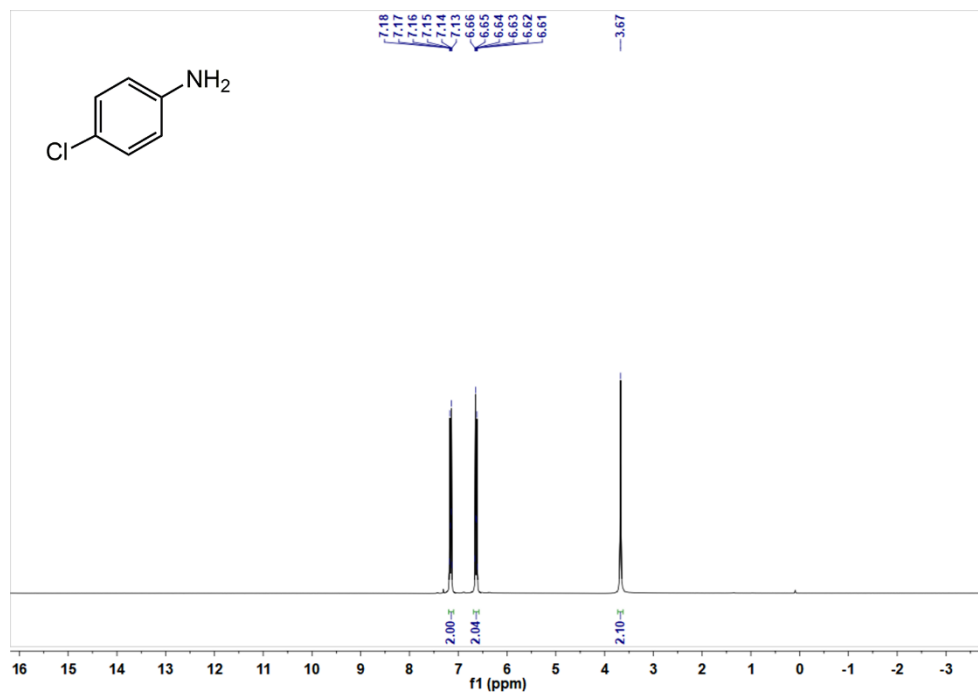

**Fig. S32**  $^1\text{H}$  NMR spectra of **2h** (500 MHz,  $\text{CDCl}_3$ ).

**4-Chloroaniline (2h):**  $^1\text{H}$  NMR (500 MHz,  $\text{CDCl}_3$ )  $\delta$  7.20 – 7.10 (m, 2H), 6.69 – 6.58 (m, 2H), 3.67 (s, 2H).

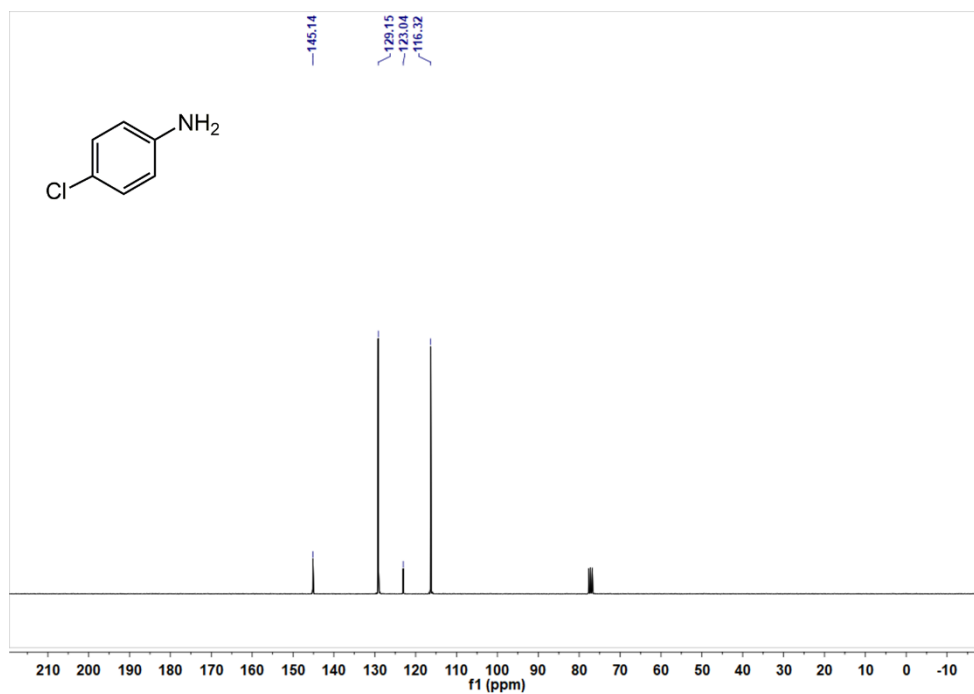

**Fig. S33**  $^{13}\text{C}$  NMR spectra of **2h** (126 MHz,  $\text{CDCl}_3$ ).

**4-Chloroaniline (2h):**  $^{13}\text{C}$  NMR (126 MHz,  $\text{CDCl}_3$ )  $\delta$  145.14 (s), 129.15 (s), 123.04 (s), 116.32 (s).

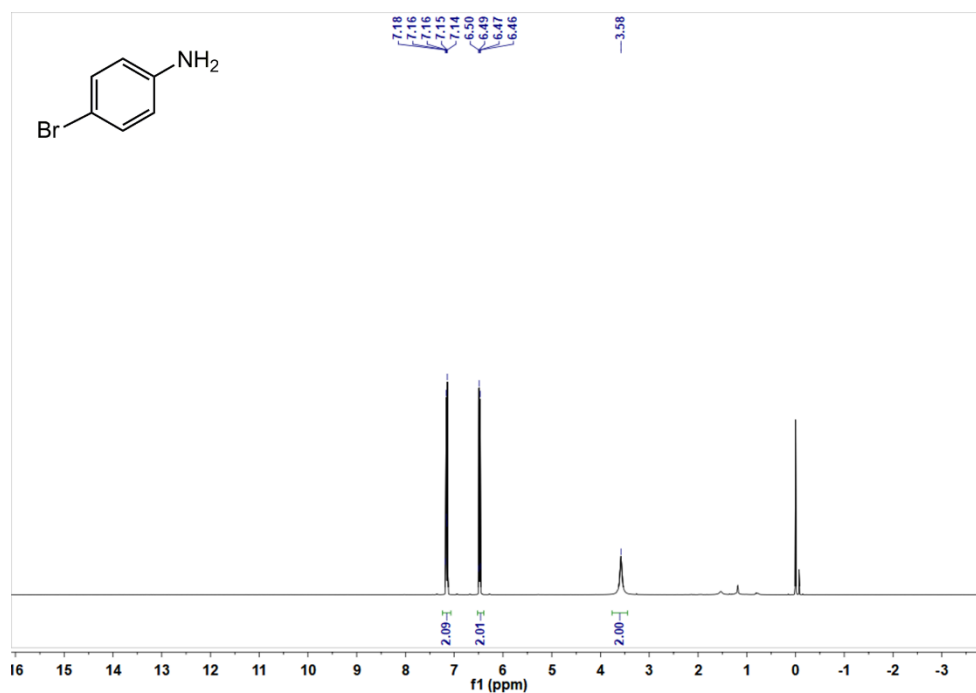

Fig. S34  $^1\text{H}$  NMR spectra of **2i** (500 MHz,  $\text{CDCl}_3$ ).

**4-Bromoaniline (2i):**  $^1\text{H}$  NMR (500 MHz,  $\text{CDCl}_3$ )  $\delta$  7.24 – 7.07 (m, 2H), 6.52 – 6.40 (m, 2H), 3.58 (s, 2H).

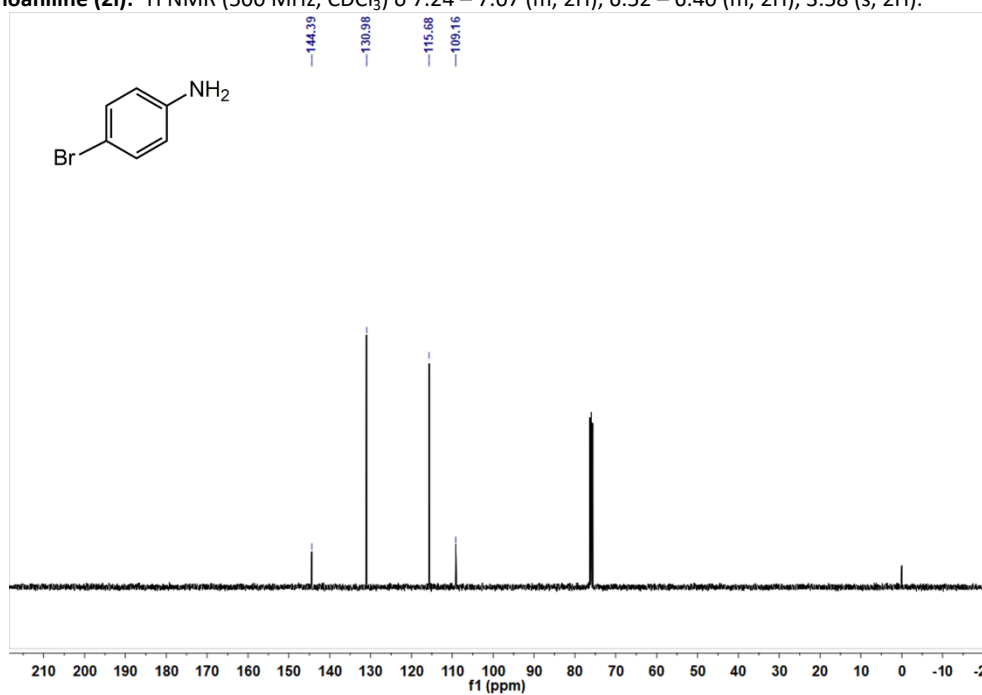

Fig. S35  $^{13}\text{C}$  NMR spectra of **2i** (126 MHz,  $\text{CDCl}_3$ ).

**4-Bromoaniline (2i):**  $^{13}\text{C}$  NMR (126 MHz,  $\text{CDCl}_3$ )  $\delta$  144.39 (s), 130.98 (s), 115.68 (s), 109.16 (s).

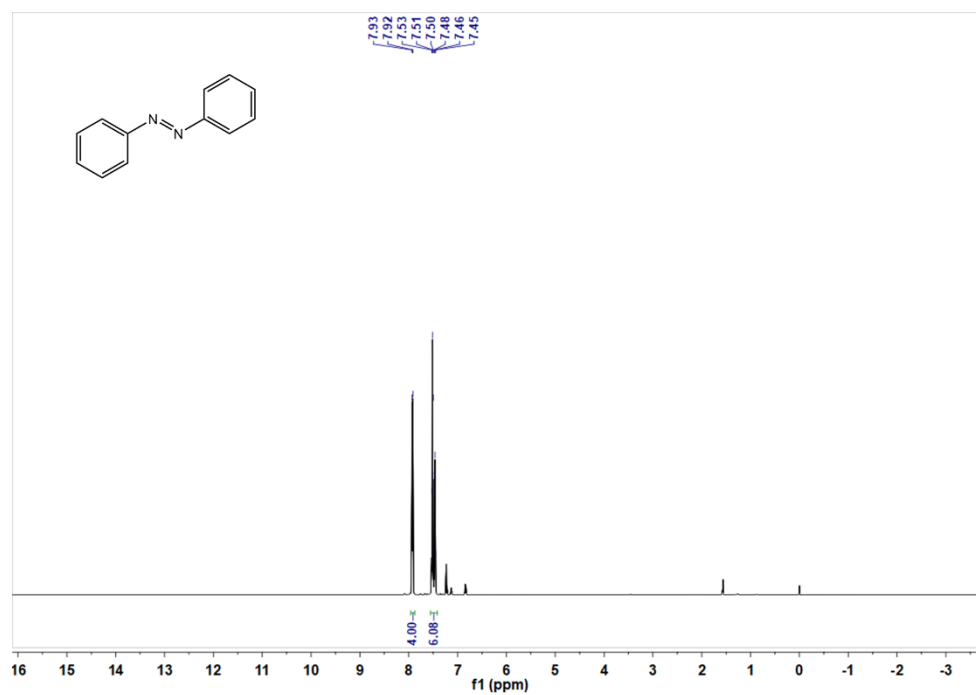

**Fig. S36**  $^1\text{H}$  NMR spectra of **3a** (500 MHz,  $\text{CDCl}_3$ ).

**Azobenzene (3a):**  $^1\text{H}$  NMR (500 MHz,  $\text{CDCl}_3$ )  $\delta$  7.92 (d,  $J$  = 8.2 Hz, 4H), 7.49 (dt,  $J$  = 24.3, 7.1 Hz, 6H).

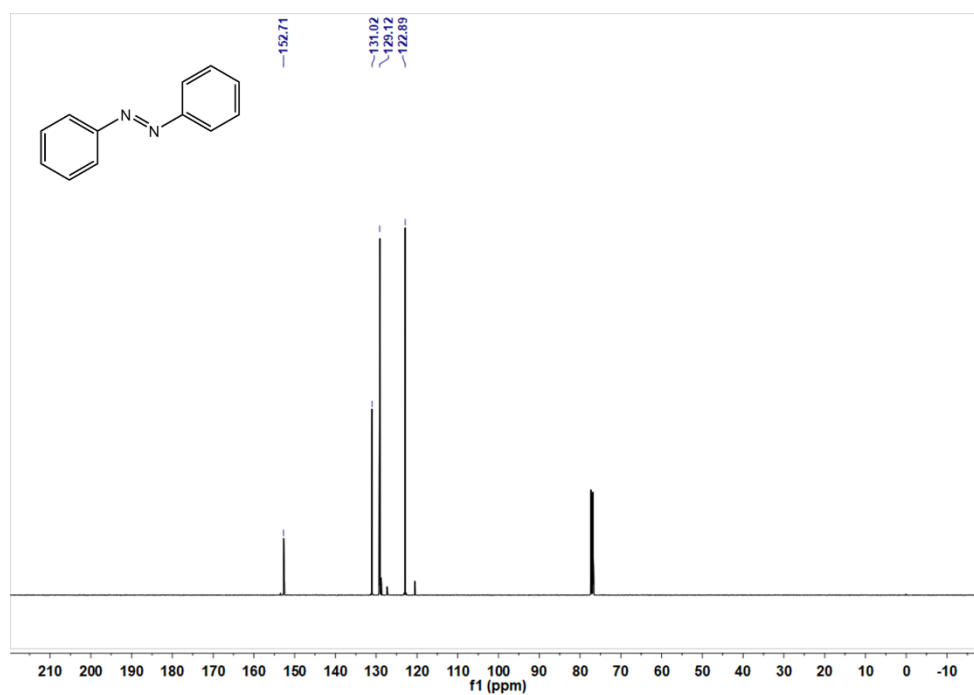

**Fig. S37**  $^{13}\text{C}$  NMR spectra of **3a** (126 MHz,  $\text{CDCl}_3$ ).

**Azobenzene (3a):**  $^{13}\text{C}$  NMR (126 MHz,  $\text{CDCl}_3$ )  $\delta$  152.71 (s), 131.02 (s), 129.12 (s), 122.89 (s).

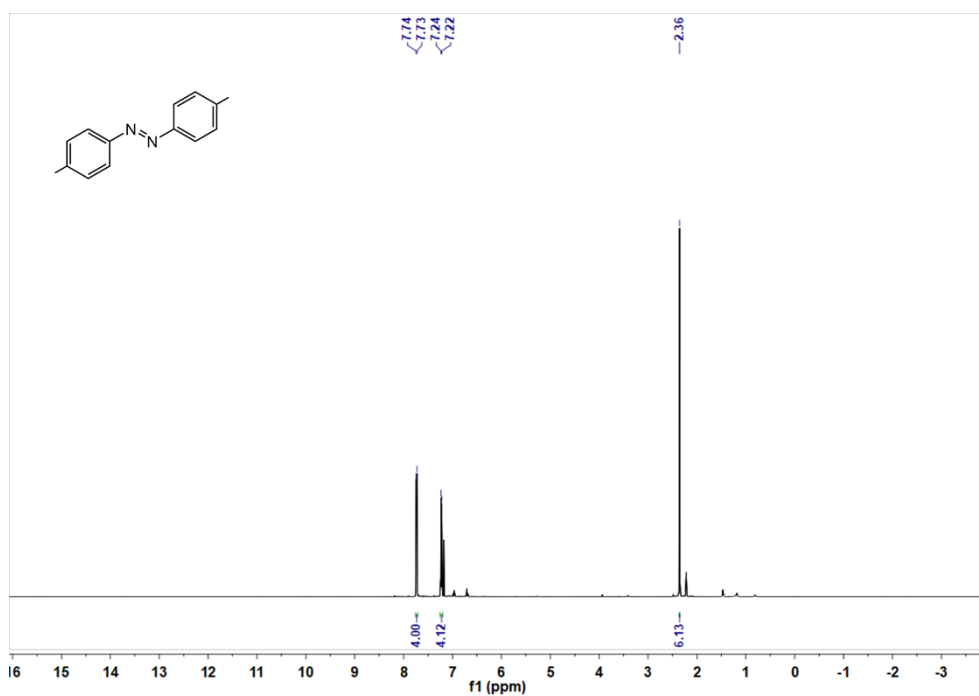

**Fig. S38**  $^1\text{H}$  NMR spectra of **3b** (500 MHz,  $\text{CDCl}_3$ ).

**(E)-1,2-di-p-tolyldiazene (3b):**  $^1\text{H}$  NMR (500 MHz,  $\text{CDCl}_3$ )  $\delta$  7.74 (d,  $J = 8.3$  Hz, 4H), 7.23 (d,  $J = 8.1$  Hz, 4H), 2.36 (s, 6H).

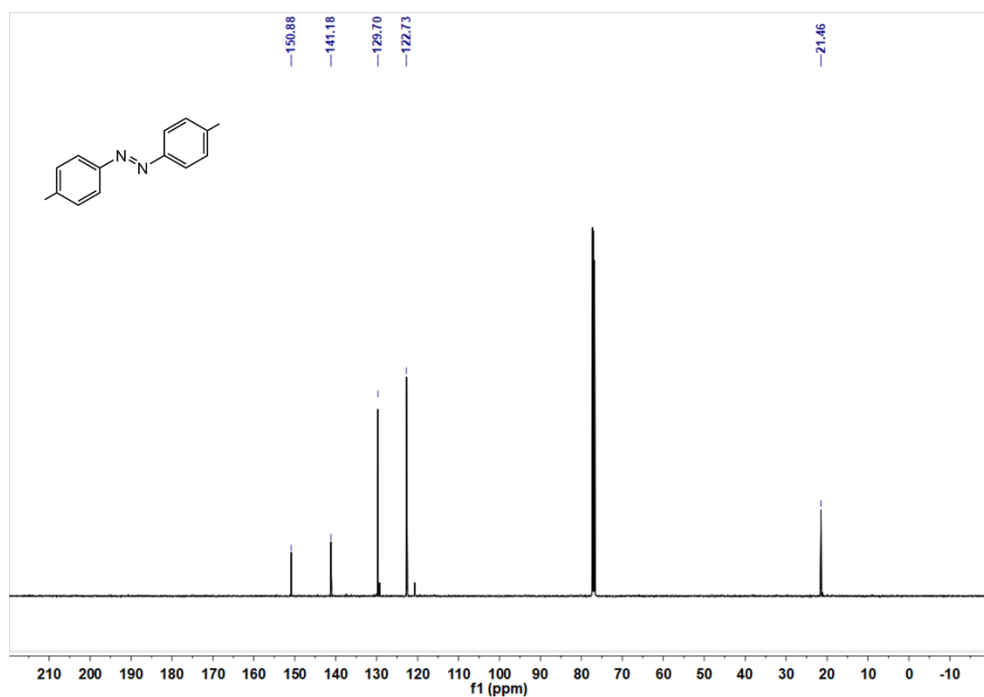

**Fig. S39**  $^{13}\text{C}$  NMR spectra of **3b** (126 MHz,  $\text{CDCl}_3$ ).

**(E)-1,2-di-p-tolyldiazene (3b):**  $^{13}\text{C}$  NMR (126 MHz,  $\text{CDCl}_3$ )  $\delta$  150.88 (s), 141.18 (s), 129.70 (s), 122.73 (s), 21.46 (s).

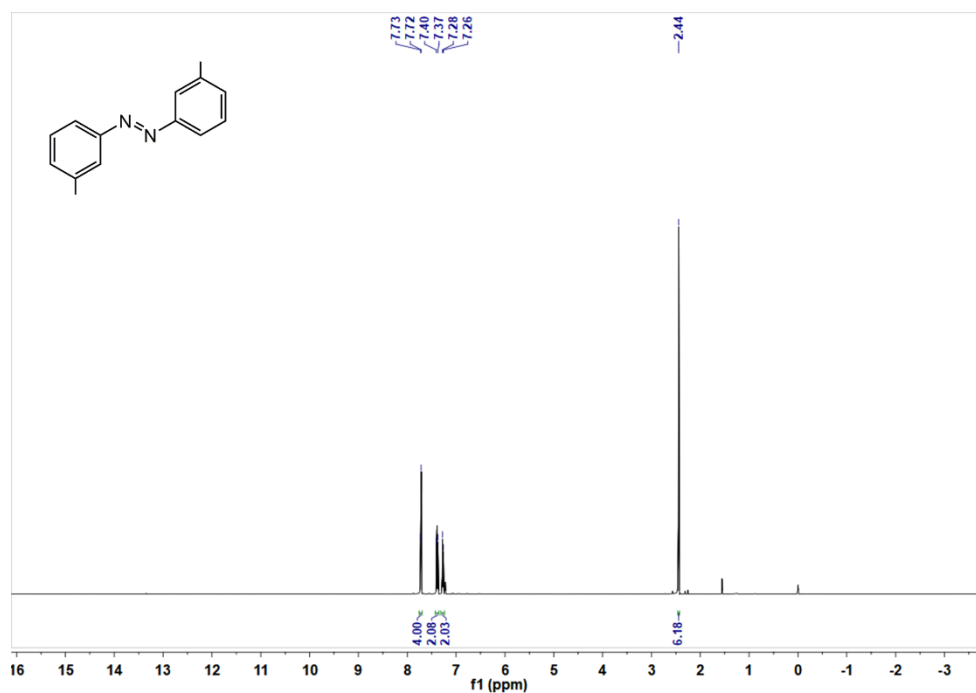

**Fig. S40**  $^1\text{H}$  NMR spectra of **3c** (500 MHz,  $\text{CDCl}_3$ ).

**(E)-1,2-di-m-tolyldiazene (3c):**  $^1\text{H}$  NMR (500 MHz,  $\text{CDCl}_3$ )  $\delta$  7.72 (d,  $J$  = 5.9 Hz, 4H), 7.39 (d,  $J$  = 16.0 Hz, 2H), 7.27 (d,  $J$  = 7.4 Hz, 2H), 2.44 (s, 6H).

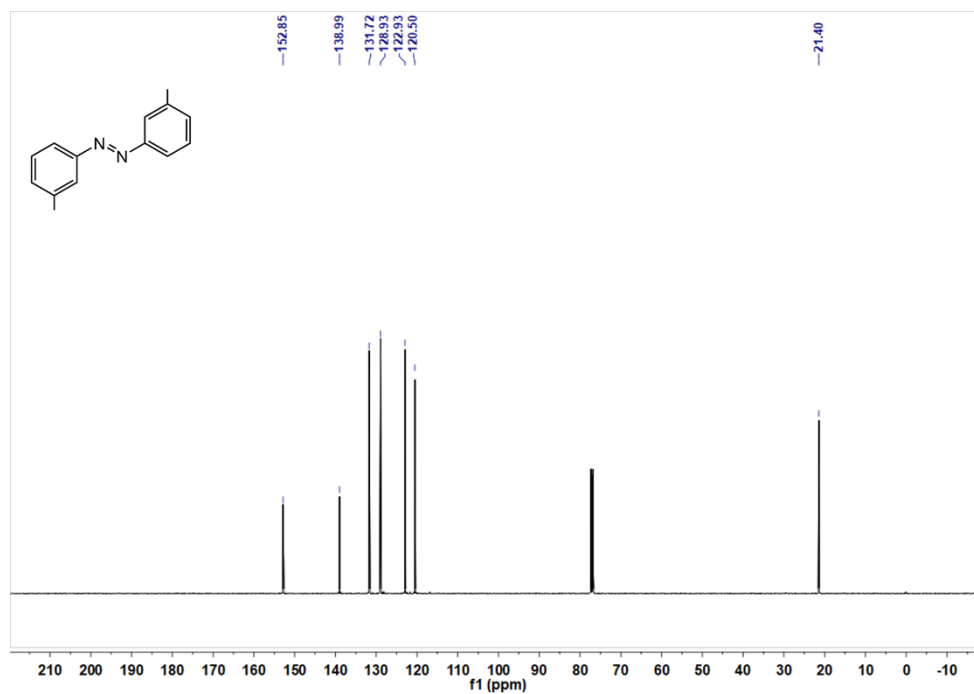

**Fig. S41**  $^{13}\text{C}$  NMR spectra of **3c** (126 MHz,  $\text{CDCl}_3$ ).

**(E)-1,2-di-m-tolyldiazene (3c):**  $^{13}\text{C}$  NMR (126 MHz,  $\text{CDCl}_3$ )  $\delta$  152.85 (s), 138.99 (s), 131.72 (s), 128.93 (s), 122.93 (s), 120.50 (s), 21.40 (s).

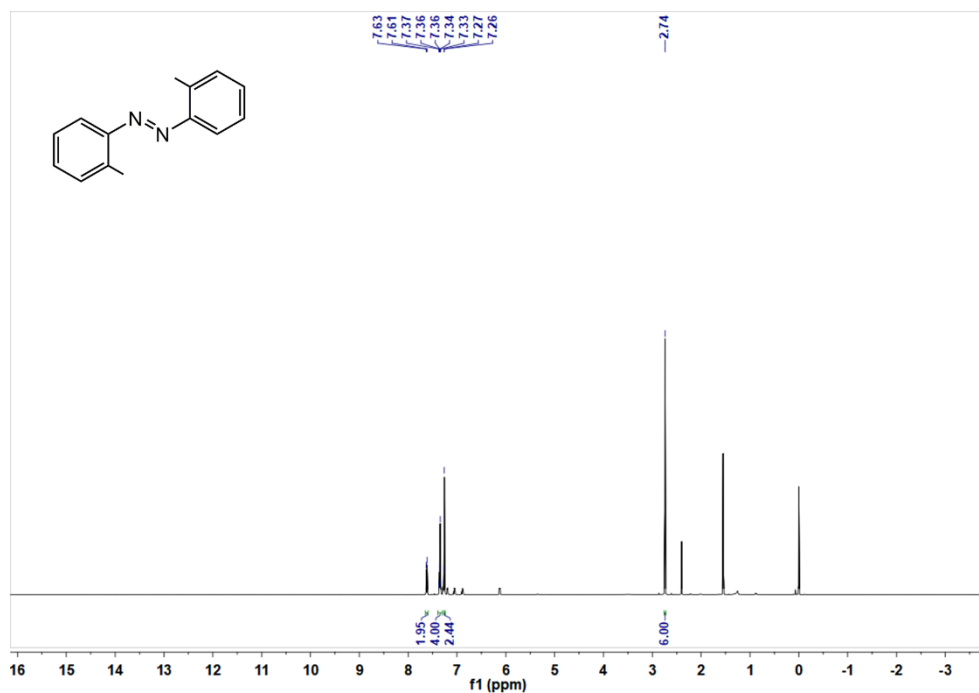

**Fig. S42**  $^1\text{H}$  NMR spectra of **3d** (500 MHz,  $\text{CDCl}_3$ ).

**(E)-1,2-Di-o-tolyldiazene (3d):**  $^1\text{H}$  NMR (500 MHz,  $\text{CDCl}_3$ )  $\delta$  7.62 (d,  $J = 7.9$  Hz, 2H), 7.39 – 7.30 (m, 4H), 7.26 (s, 2H), 2.74 (s, 6H).

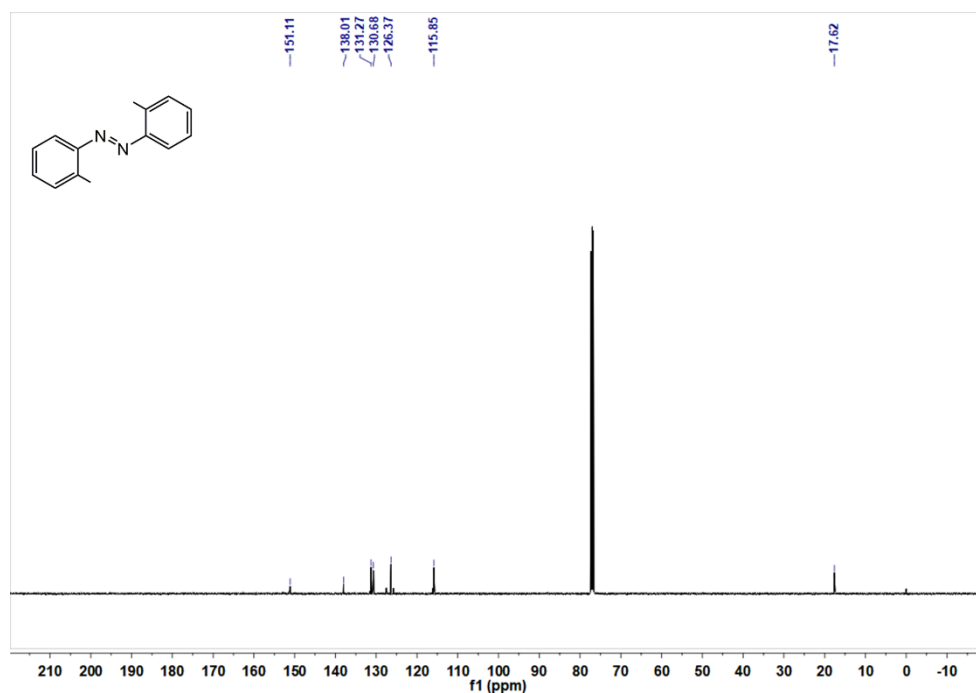

**Fig. S43**  $^{13}\text{C}$  NMR spectra of **3d** (126 MHz,  $\text{CDCl}_3$ ).

**(E)-1,2-Di-o-tolyldiazene (3d):**  $^{13}\text{C}$  NMR (126 MHz,  $\text{CDCl}_3$ )  $\delta$  151.11 (s), 138.01 (s), 131.27 (s), 130.68 (s), 126.37 (s), 115.85 (s), 17.62 (s).

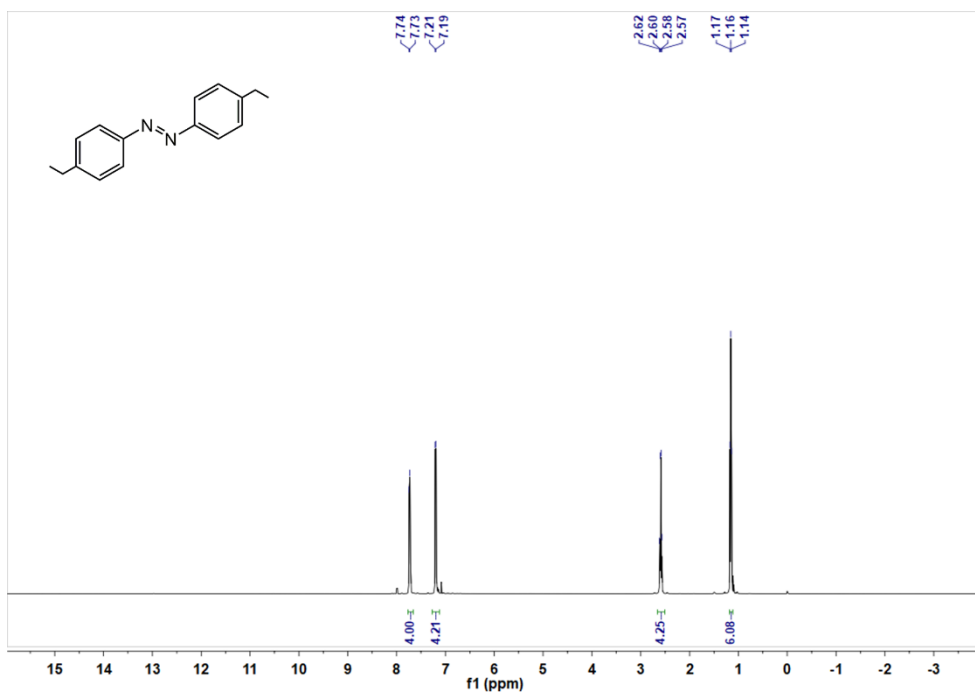

**Fig. S44**  $^1\text{H}$  NMR spectra of **3e** (500 MHz,  $\text{CDCl}_3$ ).

**(E)-1,2-bis(4-ethylphenyl)diazene (3e):**  $^1\text{H}$  NMR (500 MHz,  $\text{CDCl}_3$ )  $\delta$  7.74 (d,  $J$  = 8.2 Hz, 4H), 7.20 (d,  $J$  = 8.1 Hz, 4H), 2.59 (q,  $J$  = 7.6 Hz, 4H), 1.16 (t,  $J$  = 7.6 Hz, 6H).

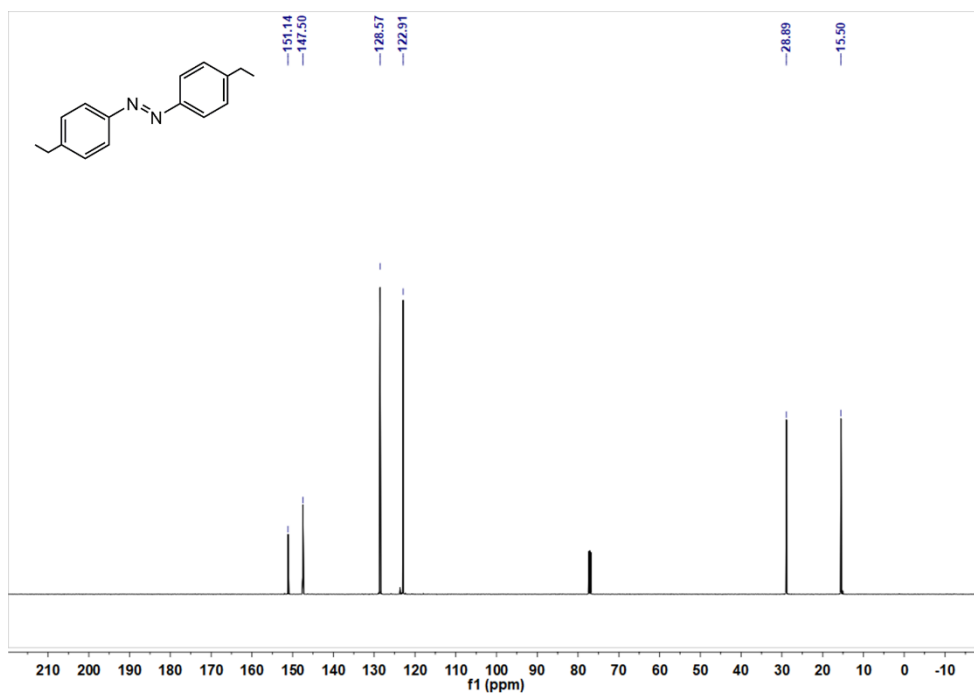

**Fig. S45**  $^{13}\text{C}$  NMR spectra of **3e** (126 MHz,  $\text{CDCl}_3$ ).

**(E)-1,2-bis(4-ethylphenyl)diazene (3e):**  $^{13}\text{C}$  NMR (126 MHz,  $\text{CDCl}_3$ )  $\delta$  151.14 (s), 147.50 (s), 128.57 (s), 122.91 (s), 28.89 (s), 15.50 (s).

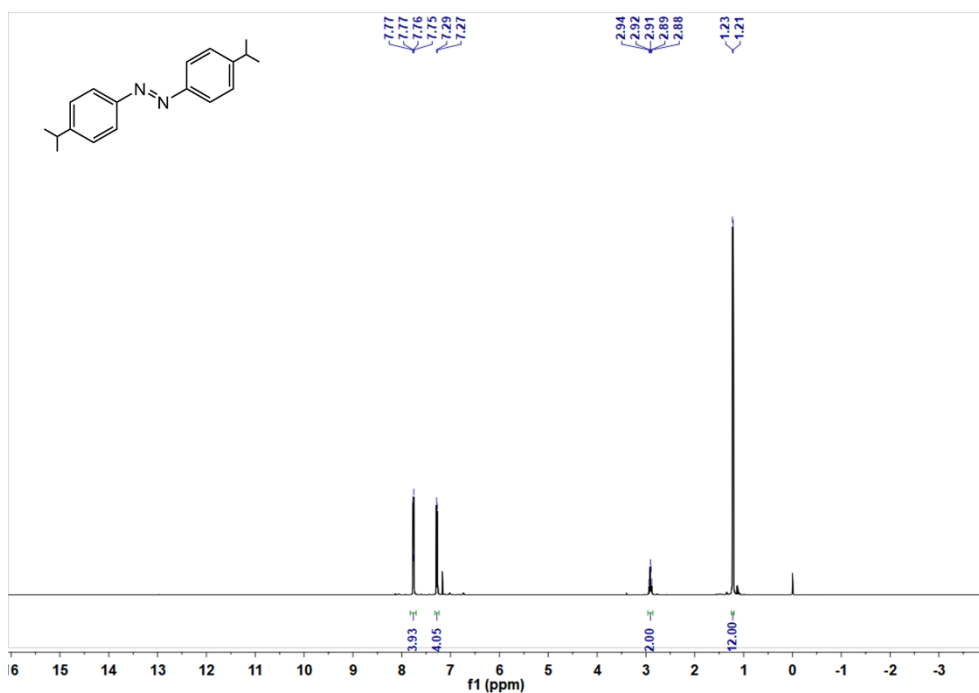

**Fig. S46**  $^1\text{H}$  NMR spectra of **3f** (500 MHz,  $\text{CDCl}_3$ ).

**(E)-1,2-bis(4-isopropylphenyl)diazene (3f):**  $^1\text{H}$  NMR (500 MHz,  $\text{CDCl}_3$ )  $\delta$  7.83 – 7.70 (m, 4H), 7.28 (d,  $J$  = 8.3 Hz, 4H), 2.91 (dt,  $J$  = 13.8, 6.9 Hz, 2H), 1.22 (d,  $J$  = 6.9 Hz, 12H).

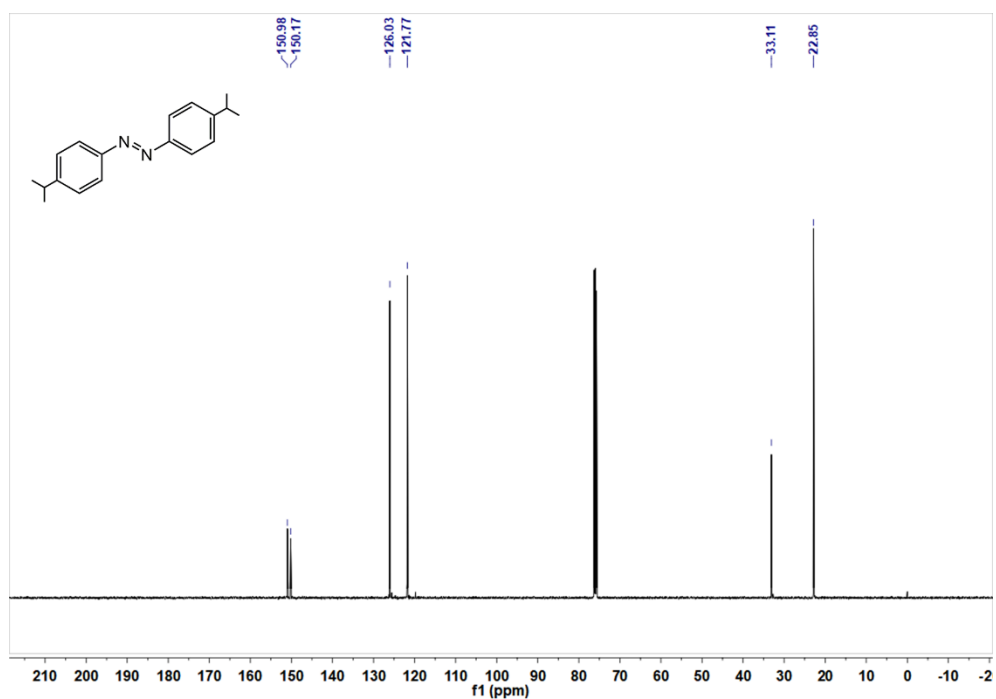

**Fig. S47**  $^{13}\text{C}$  NMR spectra of **3f** (126 MHz,  $\text{CDCl}_3$ ).

**(E)-1,2-bis(4-isopropylphenyl)diazene (3f):**  $^{13}\text{C}$  NMR (126 MHz,  $\text{CDCl}_3$ )  $\delta$  150.98 (s), 150.17 (s), 126.03 (s), 121.77 (s), 33.11 (s), 22.85 (s).



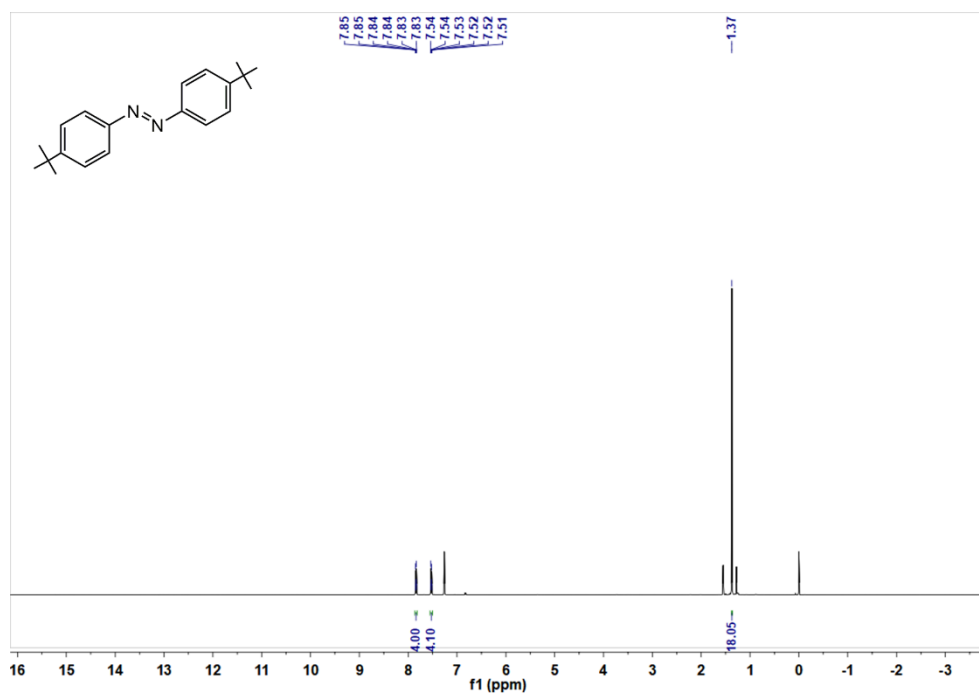

**Fig. S48**  $^1\text{H}$  NMR spectra of **3g** (500 MHz,  $\text{CDCl}_3$ ).

**(E)-1,2-bis(4-tert-butyl-phenyl)-diazene (3g):**  $^1\text{H}$  NMR (500 MHz,  $\text{CDCl}_3$ )  $\delta$  7.86 – 7.82 (m, 4H), 7.55 – 7.50 (m, 4H), 1.37 (s, 18H).

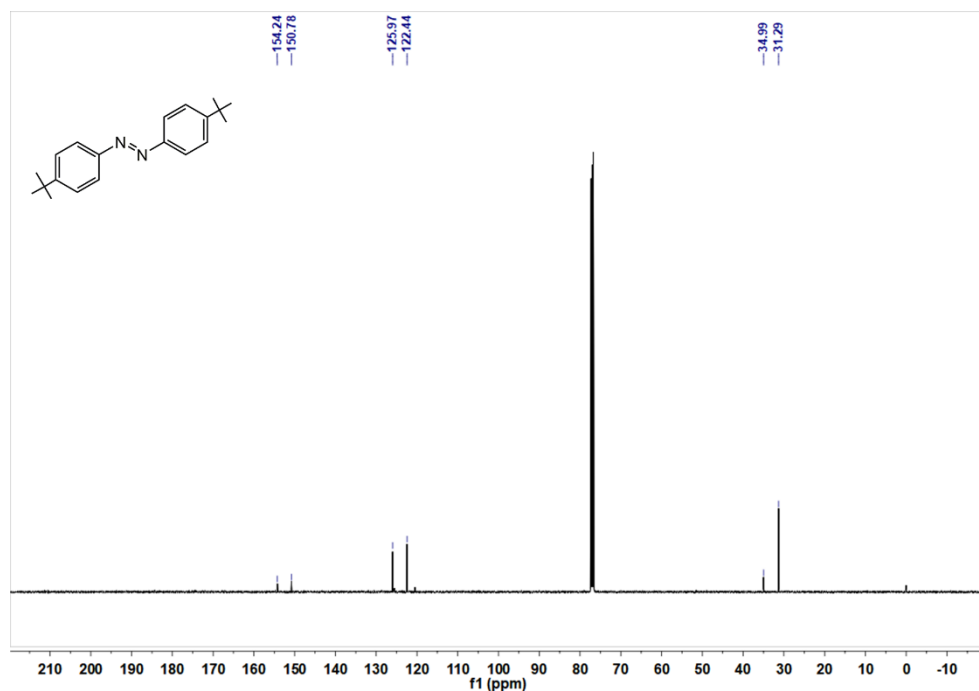

**Fig. S49**  $^{13}\text{C}$  NMR spectra of **3g** (126 MHz,  $\text{CDCl}_3$ ).

**(E)-1,2-bis(4-tert-butyl-phenyl)-diazene (3g):**  $^{13}\text{C}$  NMR (126 MHz,  $\text{CDCl}_3$ )  $\delta$  154.24 (s), 150.78 (s), 125.97 (s), 122.44 (s), 34.99 (s), 31.29 (s).

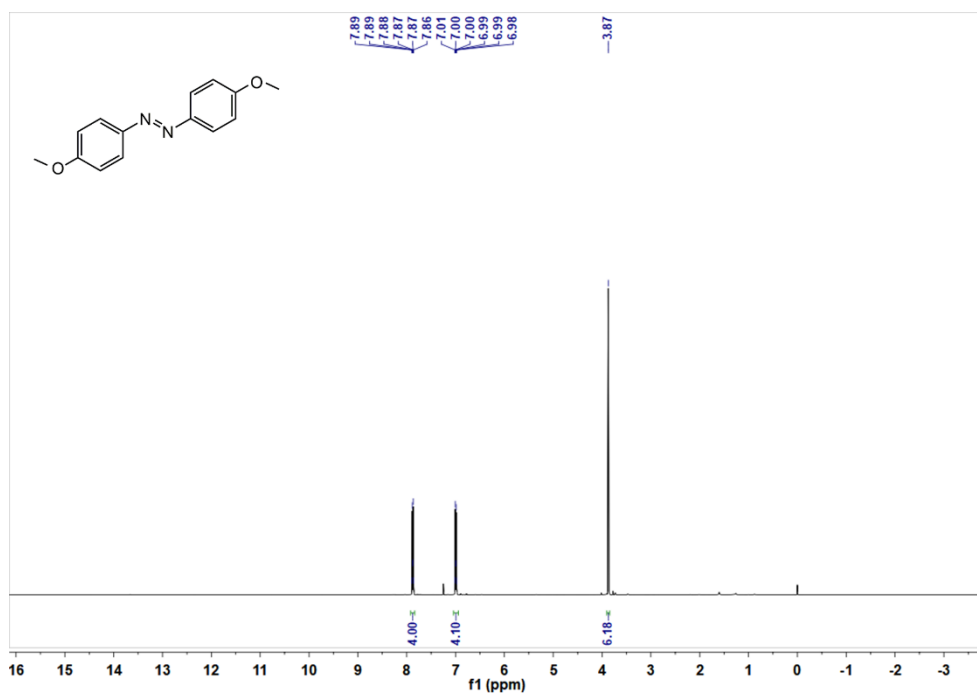

**Fig. S50**  $^1\text{H}$  NMR spectra of **3h** (500 MHz,  $\text{CDCl}_3$ ).

**(E)-1,2-Bis(4-methoxyphenyl)diazene (3h):**  $^1\text{H}$  NMR (500 MHz,  $\text{CDCl}_3$ )  $\delta$  7.92 – 7.83 (m, 4H), 7.04 – 6.94 (m, 4H), 3.87 (s, 6H).

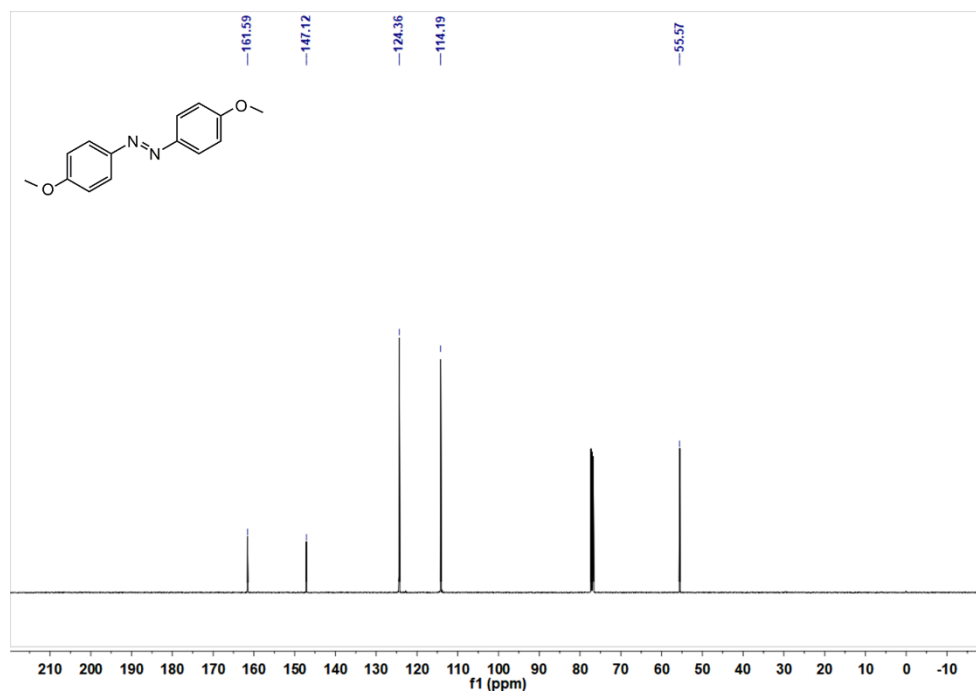

**Fig. S51**  $^{13}\text{C}$  NMR spectra of **3h** (126 MHz,  $\text{CDCl}_3$ ).

**(E)-1,2-Bis(4-methoxyphenyl)diazene (3h):**  $^{13}\text{C}$  NMR (126 MHz,  $\text{CDCl}_3$ )  $\delta$  161.59 (s), 147.12 (s), 124.36 (s), 114.19 (s), 55.57 (s).

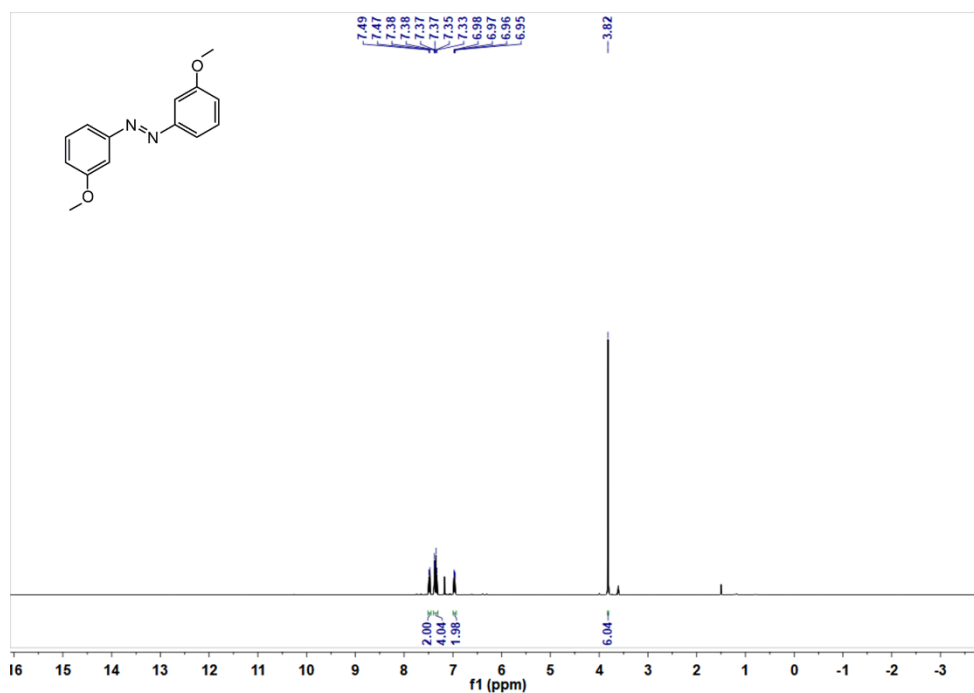

**Fig. S52**  $^1\text{H}$  NMR spectra of **3i** (500 MHz,  $\text{CDCl}_3$ ).

**(E)-1,2-bis(3-methoxyphenyl)diazene (3i):**  $^1\text{H}$  NMR (500 MHz,  $\text{CDCl}_3$ )  $\delta$  7.48 (d,  $J$  = 8.6 Hz, 2H), 7.36 (dt,  $J$  = 16.1, 5.1 Hz, 4H), 6.97 (dd,  $J$  = 8.2, 2.6 Hz, 2H), 3.82 (s, 6H).

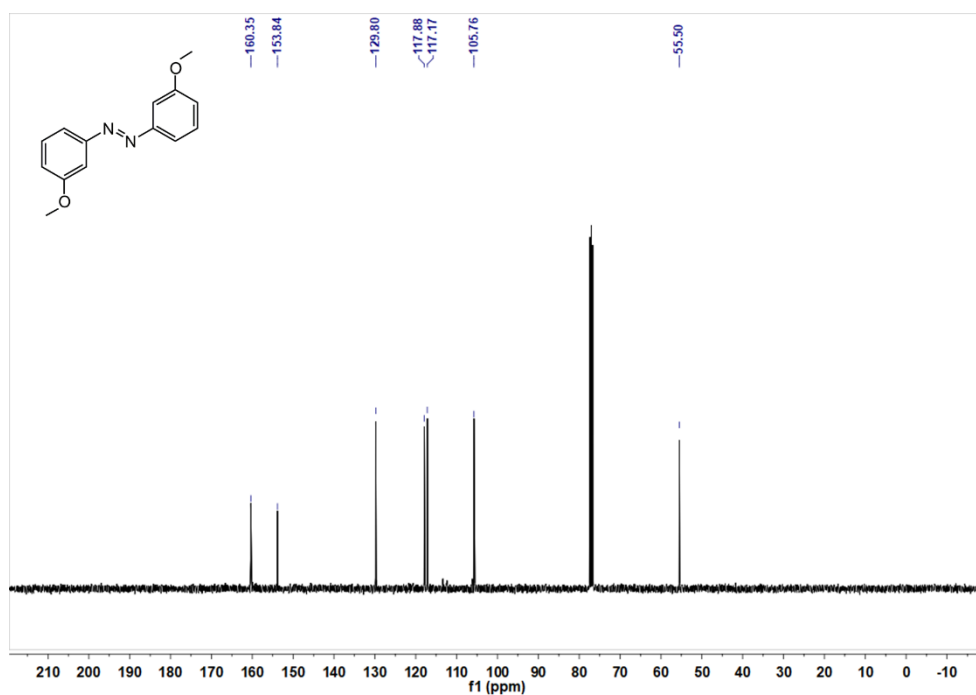

**Fig. S53**  $^{13}\text{C}$  NMR spectra of **3i** (126 MHz,  $\text{CDCl}_3$ ).

**(E)-1,2-bis(3-methoxyphenyl)diazene (3i):**  $^{13}\text{C}$  NMR (126 MHz,  $\text{CDCl}_3$ )  $\delta$  160.35 (s), 153.84 (s), 129.80 (s), 117.88 (s), 117.17 (s), 105.76 (s), 55.50 (s).

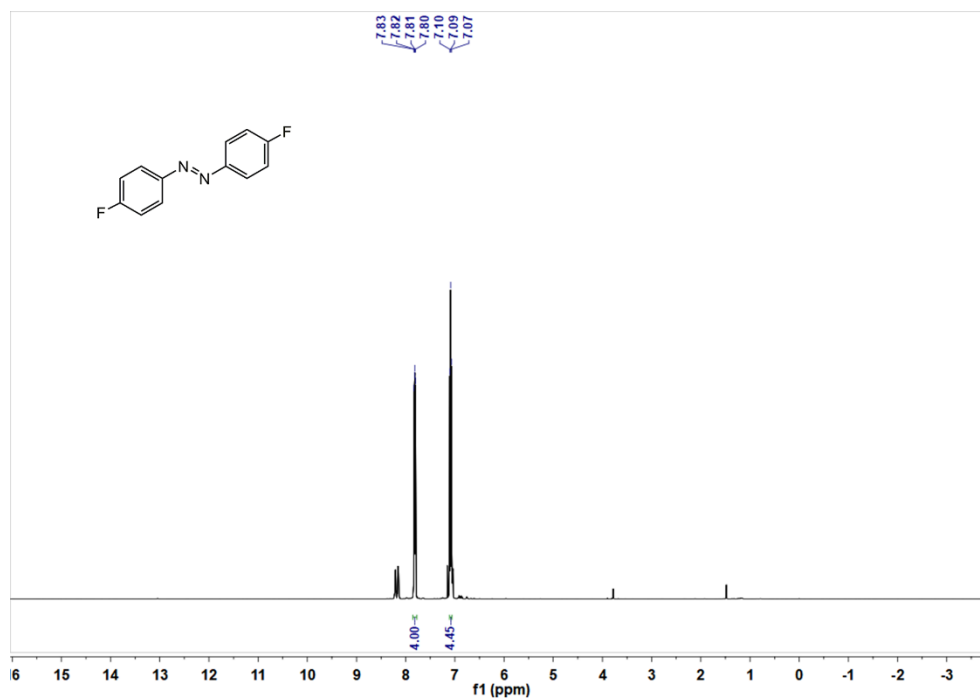

**Fig. S54**  $^1\text{H}$  NMR spectra of **3j** (500 MHz,  $\text{CDCl}_3$ ).

**(E)-1,2-bis(4-fluorophenyl)diazene (3j):**  $^1\text{H}$  NMR (500 MHz,  $\text{CDCl}_3$ )  $\delta$  7.82 (dd,  $J = 9.0, 5.2$  Hz, 4H), 7.11 – 7.06 (m, 4H).

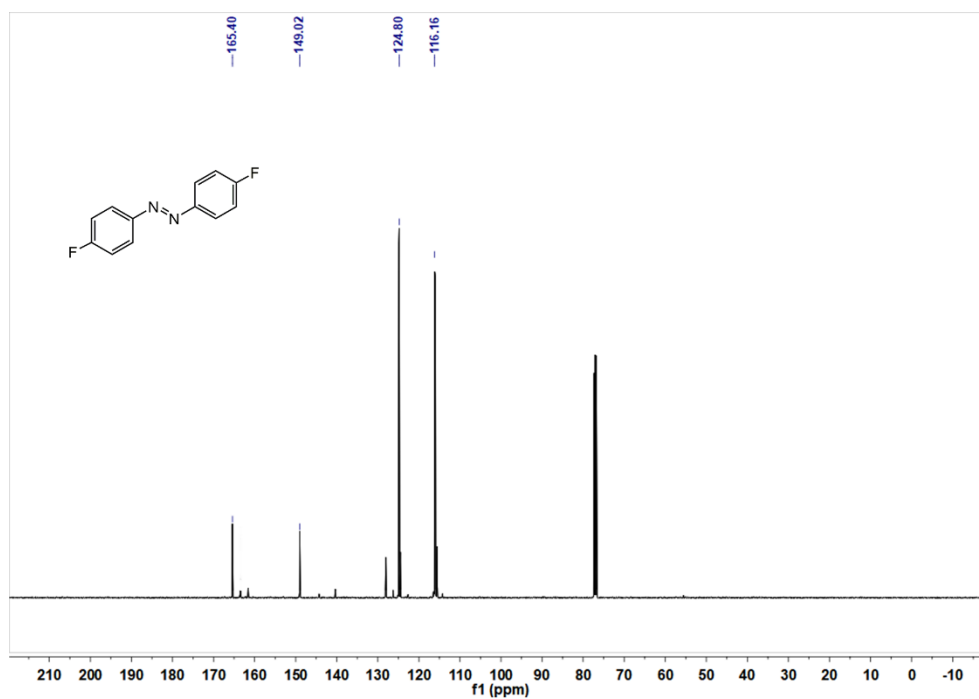

**Fig. S55**  $^{13}\text{C}$  NMR spectra of **3j** (126 MHz,  $\text{CDCl}_3$ ).

**(E)-1,2-bis(4-fluorophenyl)diazene (3j):**  $^{13}\text{C}$  NMR (126 MHz,  $\text{CDCl}_3$ )  $\delta$  165.40 (s), 149.02 (s), 124.80 (s), 116.16 (s).

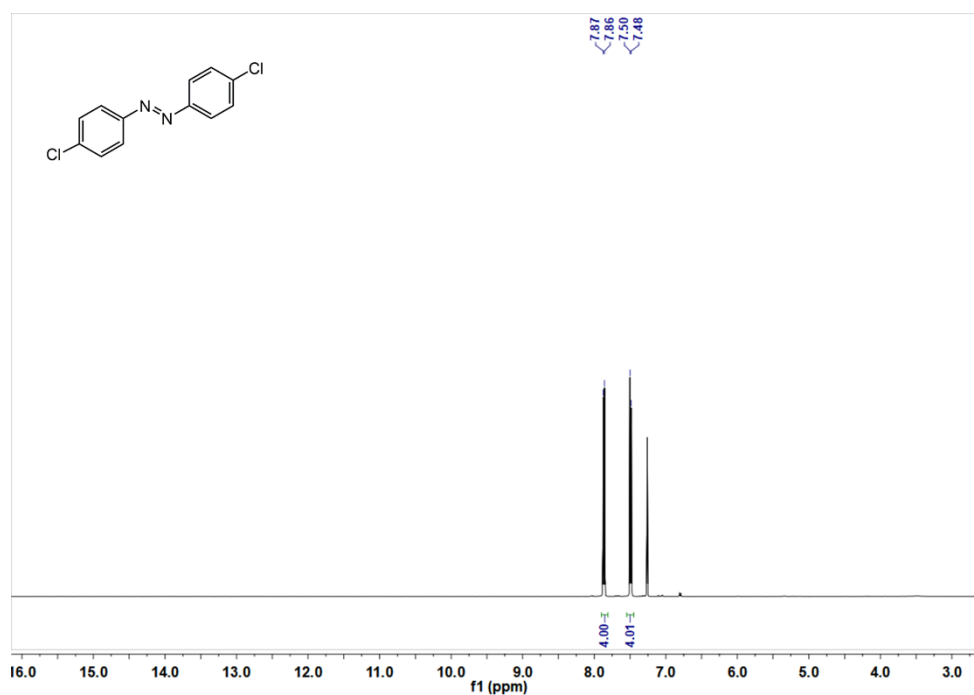

**Fig. S56**  $^1\text{H}$  NMR spectra of **3k** (500 MHz,  $\text{CDCl}_3$ ).

**(E)-1,2-bis(4-chlorophenyl)diazene (3k):**  $^1\text{H}$  NMR (500 MHz,  $\text{CDCl}_3$ )  $\delta$  7.87 (d,  $J = 8.7$  Hz, 4H), 7.49 (d,  $J = 8.7$  Hz, 4H).

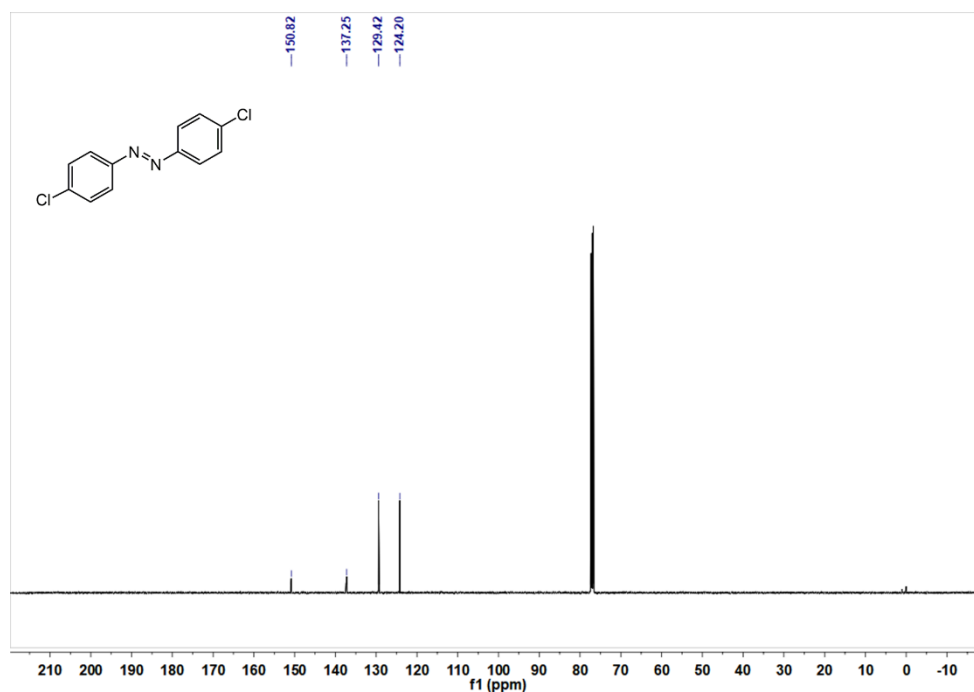

**Fig. S57**  $^{13}\text{C}$  NMR spectra of **3k** (126 MHz,  $\text{CDCl}_3$ ).

**(E)-1,2-bis(4-chlorophenyl)diazene (3k):**  $^{13}\text{C}$  NMR (126 MHz,  $\text{CDCl}_3$ )  $\delta$  150.82 (s), 137.25 (s), 129.42 (s), 124.20 (s).

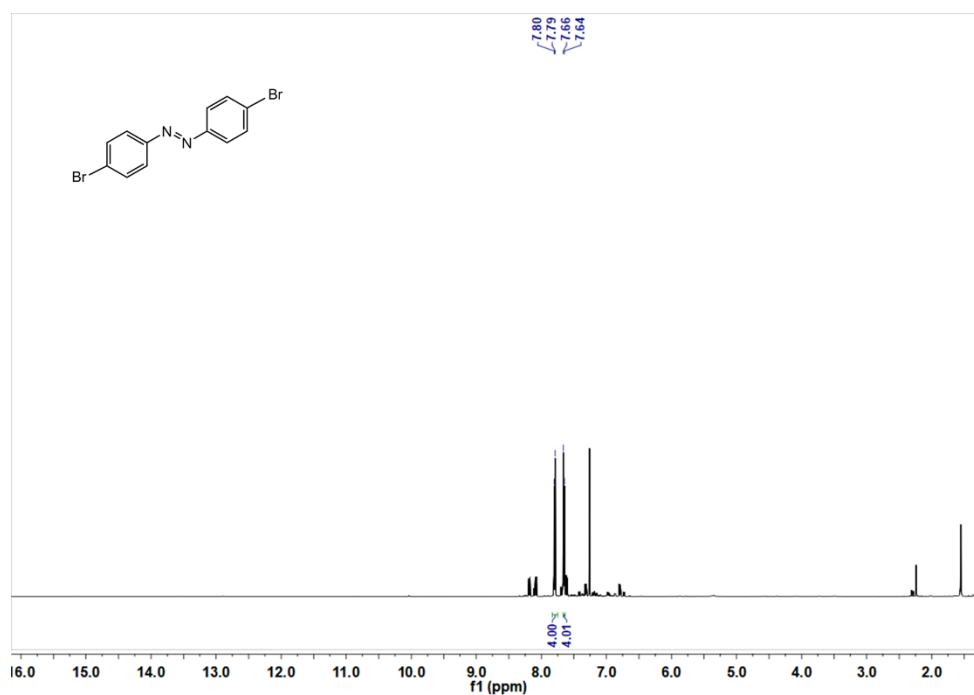

**Fig. S58**  $^1\text{H}$  NMR spectra of **3I** (500 MHz,  $\text{CDCl}_3$ ).

**(E)-1,2-bis(4-bromophenyl)diazene (3I):**  $^1\text{H}$  NMR (500 MHz,  $\text{CDCl}_3$ )  $\delta$  7.80 (d,  $J$  = 8.7 Hz, 4H), 7.65 (d,  $J$  = 8.8 Hz, 4H).

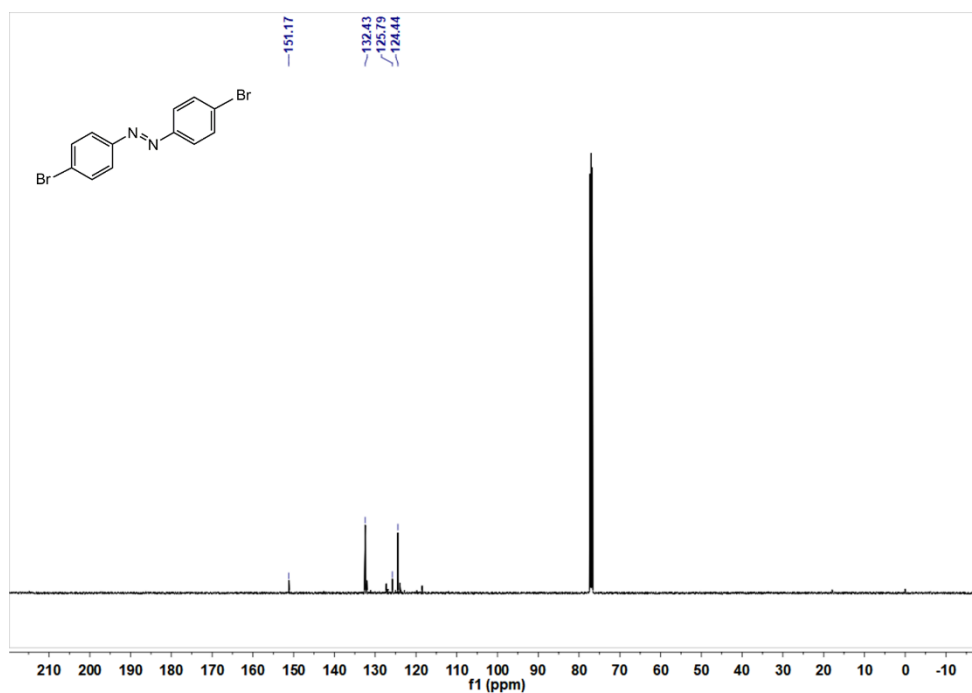

**Fig. S59**  $^{13}\text{C}$  NMR spectra of **3I** (126 MHz,  $\text{CDCl}_3$ ).

**(E)-1,2-bis(4-bromophenyl)diazene (3I):**  $^{13}\text{C}$  NMR (126 MHz,  $\text{CDCl}_3$ )  $\delta$  151.17 (s), 132.43 (s), 125.79 (s), 124.44 (s).

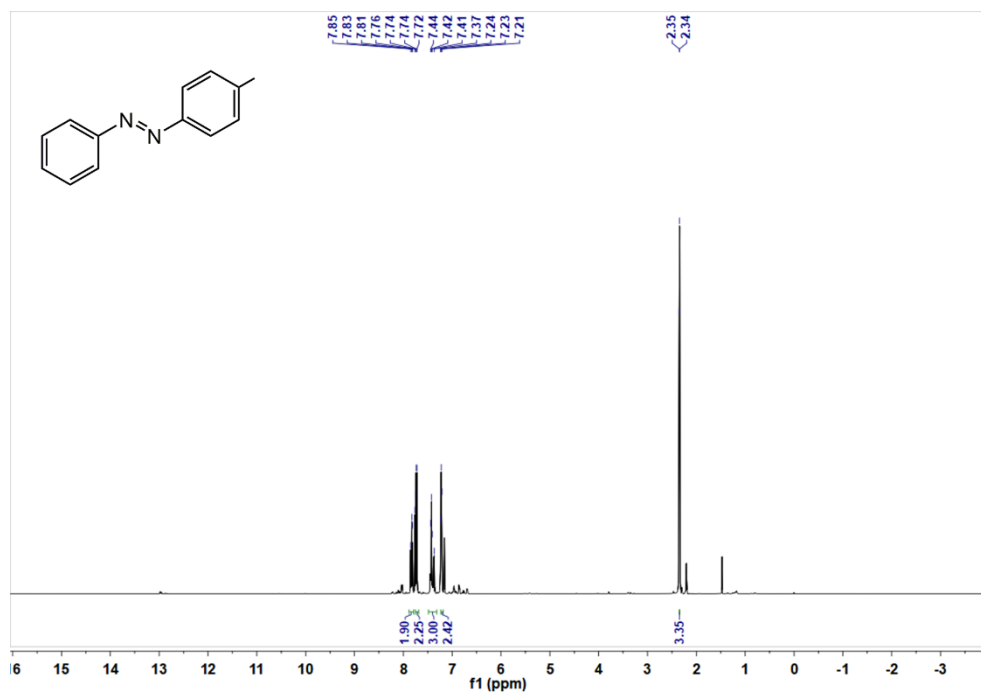

**Fig. S60**  $^1\text{H}$  NMR spectra of **3m** (500 MHz,  $\text{CDCl}_3$ ).

**(E)-1-(4-methylphenyl)-2-phenyldiazene (3m):**  $^1\text{H}$  NMR (500 MHz,  $\text{CDCl}_3$ )  $\delta$  7.89 – 7.79 (m, 2H), 7.75 – 7.69 (m, 2H), 7.41 (dd,  $J = 21.6, 13.8$  Hz, 3H), 7.22 (d,  $J = 8.0$  Hz, 2H), 2.35 (d,  $J = 3.7$  Hz, 3H).

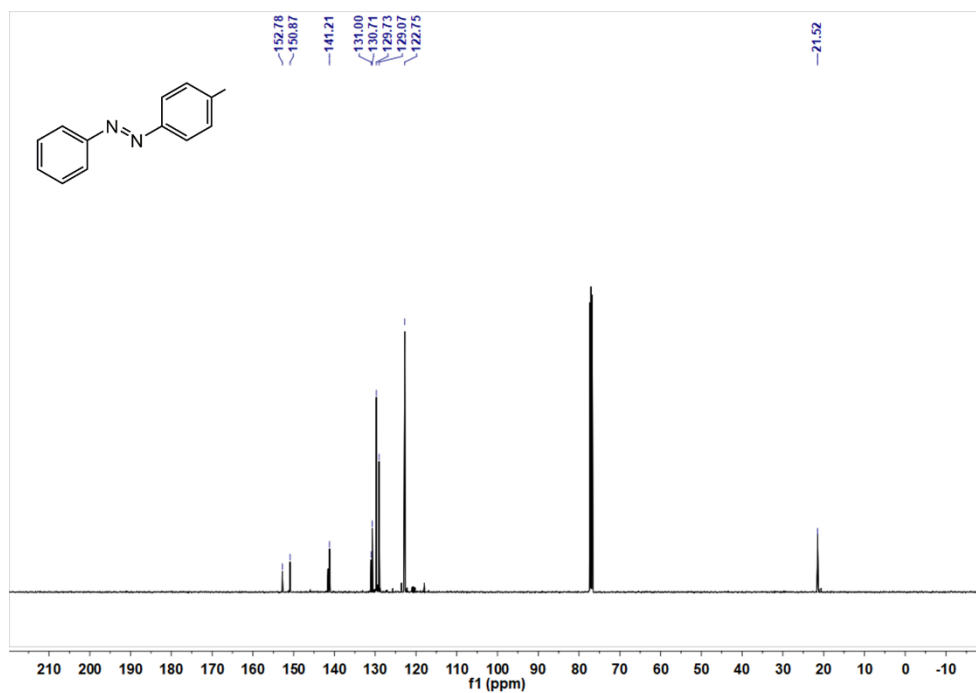

**Fig. S61**  $^{13}\text{C}$  NMR spectra of **3m** (126 MHz,  $\text{CDCl}_3$ ).

**(E)-1-(4-methylphenyl)-2-phenyldiazene (3m):**  $^{13}\text{C}$  NMR (126 MHz,  $\text{CDCl}_3$ )  $\delta$  152.78 (s), 150.87 (s), 141.21 (s), 131.00 (s), 130.71 (s), 129.73 (s), 129.07 (s), 122.75 (s), 21.52 (s).

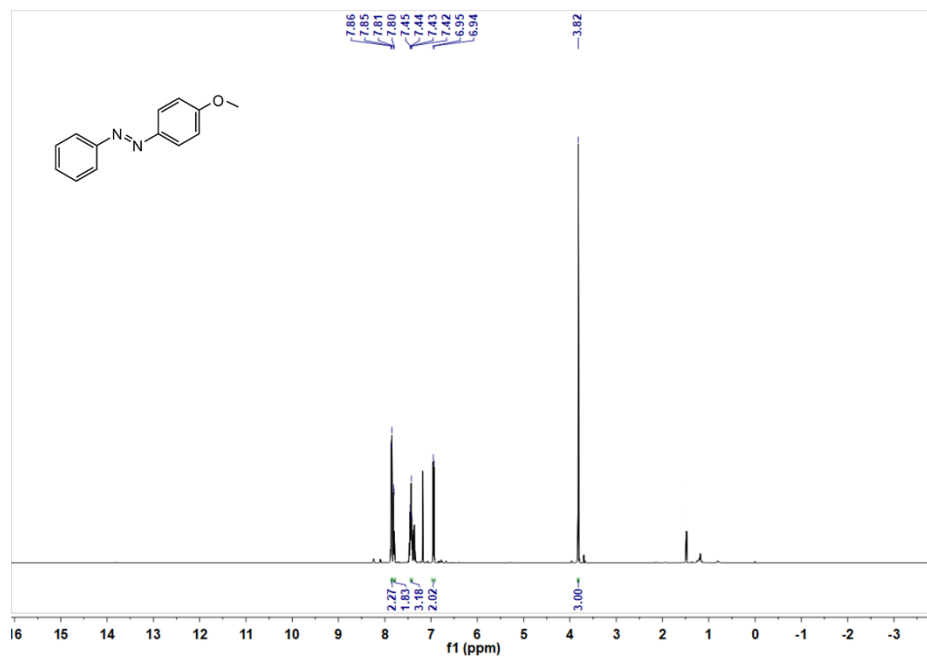

**Fig. S62**  $^1\text{H}$  NMR spectra of **3n** (500 MHz,  $\text{CDCl}_3$ ).

**(E)-1-(4-methoxyphenyl)-2-phenyldiazene (3n):**  $^1\text{H}$  NMR (500 MHz,  $\text{CDCl}_3$ )  $\delta$  7.85 (s, 2H), 7.81 (d,  $J$  = 7.2 Hz, 2H), 7.43 (t,  $J$  = 4.9 Hz, 3H), 6.94 (d,  $J$  = 9.0 Hz, 2H), 3.82 (s, 3H).

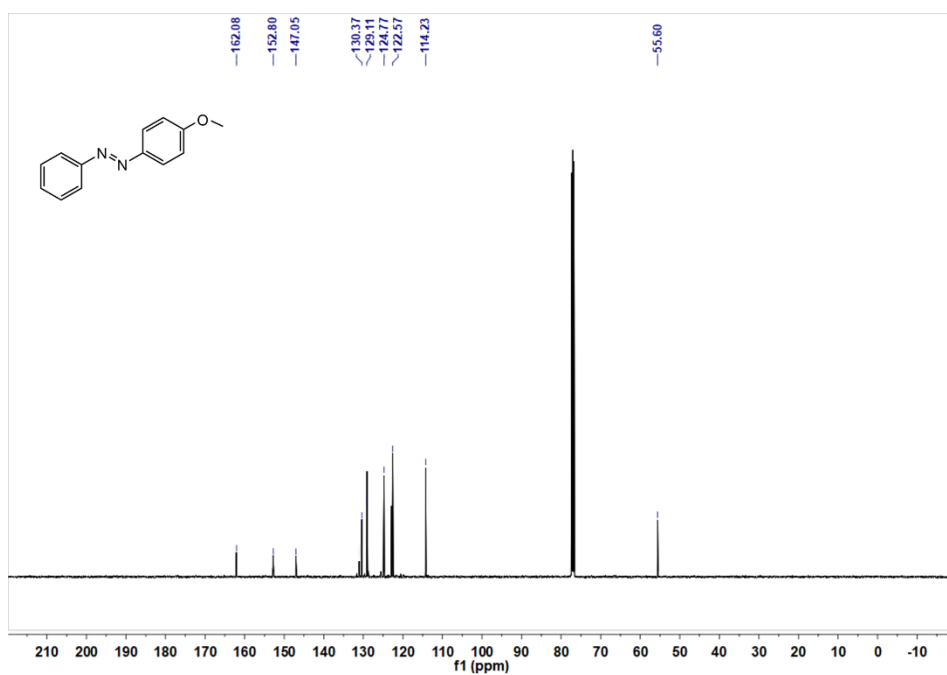

**Fig. S63**  $^{13}\text{C}$  NMR spectra of **3n** (126 MHz,  $\text{CDCl}_3$ ).

**(E)-1-(4-methoxyphenyl)-2-phenyldiazene (3n):**  $^{13}\text{C}$  NMR (126 MHz,  $\text{CDCl}_3$ )  $\delta$  162.08 (s), 152.80 (s), 147.05 (s), 130.37 (s), 129.11 (s), 124.77 (s), 122.57 (s), 114.23 (s), 55.60 (s).



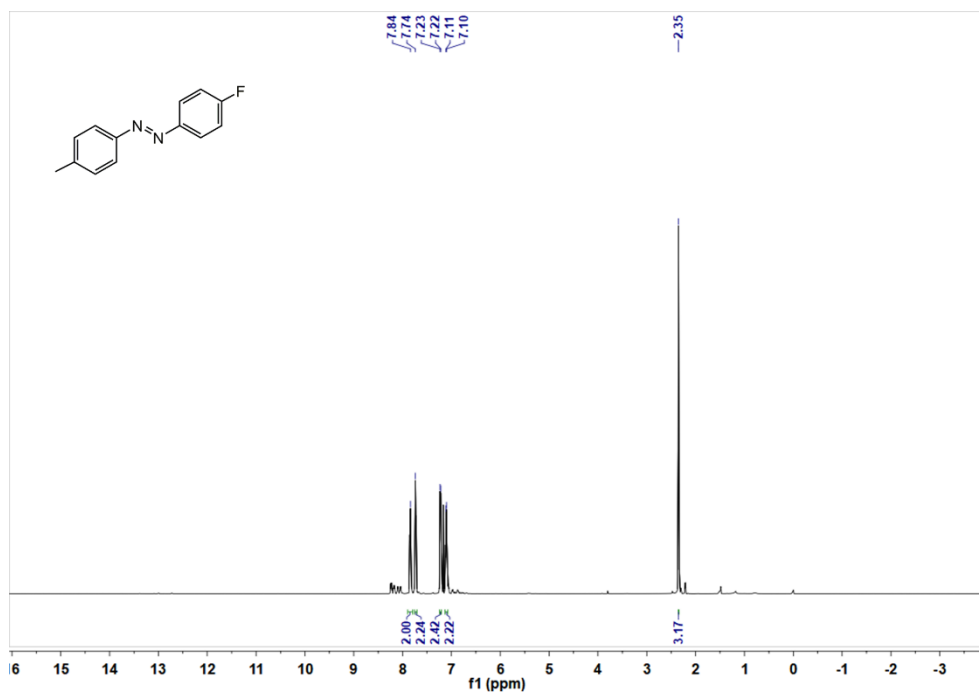

**Fig. S64**  $^1\text{H}$  NMR spectra of **3o** (500 MHz,  $\text{CDCl}_3$ ).

**(E)-2-(4-fluorophenyl)-1-(4-methylphenyl)diazene (3o):**  $^1\text{H}$  NMR (500 MHz,  $\text{CDCl}_3$ )  $\delta$  7.84 (s, 2H), 7.74 (s, 2H), 7.23 (d,  $J = 7.9$  Hz, 2H), 7.11 (d,  $J = 4.0$  Hz, 2H), 2.35 (s, 3H).

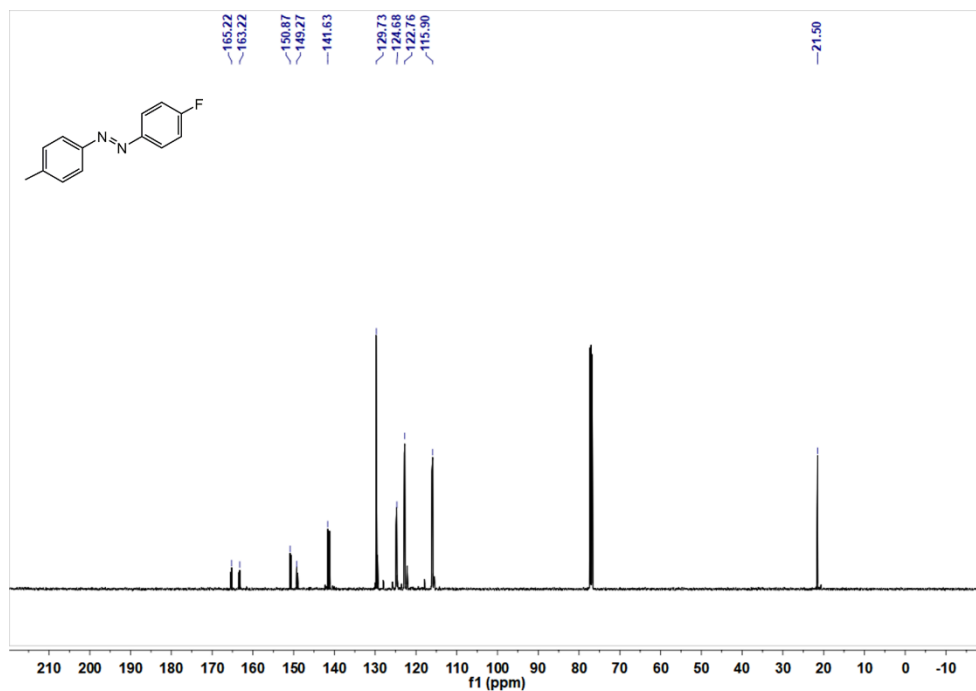

**Fig. S65**  $^{13}\text{C}$  NMR spectra of **3o** (126 MHz,  $\text{CDCl}_3$ ).

**(E)-2-(4-fluorophenyl)-1-(4-methylphenyl)diazene (3o):**  $^{13}\text{C}$  NMR (126 MHz,  $\text{CDCl}_3$ )  $\delta$  165.22 (s), 163.22 (s), 150.87 (s), 149.27 (s), 141.63 (s), 129.73 (s), 124.68 (s), 122.76 (s), 115.90 (s), 21.50 (s).

- 1 O. V. Dolomanov, L. J. Bourhis, R. J. Gildea, J. A. K. Howard and H. Puschmann, *J. Appl. Crystallogr.*, 2009, **42**, 339–341.
- 2 G. M. Sheldrick, *Acta Crystallogr., Sect. C: Struct. Chem.*, 2015, **71**, 3–8.
- 3 L. MacDonald, B. Rausch, M. D. Symes and L. Cronin, *Chem. Commun.*, 2018, **54**, 1093–1096.
- 4 T. H. Fleisch and G. J. Mains, *The Journal of Chemical Physics*, 1982, **76**, 780–786.
- 5 W. Feng, Y. Ding, Y. Liu and R. Lu, *Materials Chemistry and Physics*, 2006, **98**, 347–352.
- 6 Z. Xu, R. G. Palgrave and M. A. Hayward, *Inorg. Chem.*, 2020, **59**, 13767–13773.
- 7 M. Sheikhzadeh, S. Hejazi, S. Mohajernia, O. Tomanec, M. Mokhtar, A. Alshehri, S. Sanjabi, R. Zboril and P. Schmuki, *ChemCatChem*, 2019, **11**, 6258–6262.
- 8 C.-C. Nguyen, C.-T. Dinh and T.-O. Do, *RSC Adv.*, 2017, **7**, 3480–3487.
- 9 J. Kuncewicz and B. Ohtani, *RSC Adv.*, 2016, **6**, 77201–77211.
- 10 C. Ritchie, M. Speldrich, R. W. Gable, L. Sorace, P. Kögerler and C. Boskovic, *Inorg. Chem.*, 2011, **50**, 7004–7014.
- 11 H. Li, W. Chen, Y. Zhao, Y. Zou, X. Zhao, J. Song, P. Ma, J. Niu and J. Wang, *Nanoscale*, 2021, **13**, 8077–8086.
- 12 L.-P. Ji, J. Du, J.-S. Li, L.-C. Zhang, X.-J. Sang, H. Yang, H.-J. Cui and Z.-M. Zhu, *RSC Adv.*, 2016, **6**, 28956–28959.
- 13 R. Gupta, I. Khan, F. Hussain, A. M. Bossoh, I. M. Mbomekallé, P. de Oliveira, M. Sadakane, C. Kato, K. Ichihashi, K. Inoue and S. Nishihara, *Inorg. Chem.*, 2017, **56**, 8759–8767.
- 14 P. Ma, R. Wan, Y. Si, F. Hu, Y. Wang, J. Niu and J. Wang, *Dalton Trans.*, 2015, **44**, 11514–11523.
- 15 X.-J. Yang, M. Sun, H.-Y. Zang, Y.-Y. Ma, X.-J. Feng, H.-Q. Tan, Y.-H. Wang and Y.-G. Li, *Chem. – Asian J.*, 2016, **11**, 858–867.
- 16 X. Ma, K. Yu, J. Yuan, L. Cui, J. Lv, W. Dai and B. Zhou, *Inorg. Chem.*, 2020, **59**, 5149–5160.
- 17 W. Chen, H. Li, J. Song, Y. Zhao, P. Ma, J. Niu and J. Wang, *Inorg. Chem.*, 2022, **61**, 2076–2085.
- 18 F. Song, Y. Ding, B. Ma, C. Wang, Q. Wang, X. Du, S. Fu and J. Song, *Energy Environ. Sci.*, 2013, **6**, 1170.
- 19 X.-B. Han, Z.-M. Zhang, T. Zhang, Y.-G. Li, W. Lin, W. You, Z.-M. Su and E.-B. Wang, *J. Am. Chem. Soc.*, 2014, **136**, 5359–5366.
- 20 X.-B. Han, Y.-G. Li, Z.-M. Zhang, H.-Q. Tan, Y. Lu and E.-B. Wang, *J. Am. Chem. Soc.*, 2015, **137**, 5486–5493.
- 21 Y. Sheng, X. Wang, S. Yue, G. Cheng, X. Zou and X. Lu, *ChemCatChem*, 2020, **12**, 4632–4641.
- 22 Y. Xie, X. Shang, D. Liu, H. Zhao, Y. Gu, Z. Zhang and X. Wang, *Applied Catalysis B: Environmental*, 2019, **259**, 118087.
- 23 A. Kumar, B. Paul, R. Boukherroub and S. L. Jain, *Journal of Hazardous Materials*, 2020, **387**, 121700.
- 24 C. Yao, A. Yuan, Z. Wang, H. Lei, L. Zhang, L. Guo and X. Dong, *J. Mater. Chem. A*, 2019, **7**, 13071–13079.
- 25 B. Wang, Z. Deng and Z. Li, *Journal of Catalysis*, 2020, **389**, 241–246.
- 26 S. Han, Y. Cheng, S. Liu, C. Tao, A. Wang, W. Wei, H. Yu and Y. Wei, *Angew. Chem.*, 2021, **133**, 6452–6455.
- 27 J. Qin, Y. Long, F. Sun, P. Zhou, W. D. Wang, N. Luo and J. Ma, *Angew. Chem. Int. Ed.*, 2021, **60**, 2–9.
- 28 J. Jiao, H. Sun, C. Si, J. Xu, T. Zhang and Q. Han, *ACS Appl. Mater. Interfaces*, 2022, **14**, 16386–16393.
- 29 Y.-M. Lu, H.-Z. Zhu, W.-G. Li, B. Hu and S.-H. Yu, *J. Mater. Chem. A*, 2013, **1**, 3783–3788.
- 30 F. Tong, X. Liang, F. Ma, X. Bao, Z. Wang, Y. Liu, P. Wang, H. Cheng, Y. Dai, B. Huang and Z. Zheng, *ACS Catal.*, 2021, **11**, 3801–3809.
- 31 S. Földner, P. Pohla, H. Bartling, S. Dankesreiter, R. Stadler, M. Gruber, A. Pfitzner and B. König, *Green Chem.*, 2011, **13**, 640–643.
- 32 P. Ji, K. Manna, Z. Lin, X. Feng, A. Urban, Y. Song and W. Lin, *J. Am. Chem. Soc.*, 2017, **139**, 7004–7011.
- 33 M. M. El-Masry, M. El-Shahat, R. Ramadan and R. M. Abdelhameed, *J Mater Sci: Mater Electron*, 2021, **32**, 18408–18424.
- 34 C. Liao, B. Liu, Q. Chi and Z. Zhang, *ACS Appl. Mater. Interfaces*, 2018, **10**, 44421–44429.
- 35 M. Tian, X. Cui, K. Liang, J. Ma and Z. Dong, *Inorg. Chem. Front.*, 2016, **3**, 1332–1340.
- 36 Y. Jang, S. Kim, S. W. Jun, B. H. Kim, S. Hwang, I. K. Song, B. M. Kim and T. Hyeon, *Chem. Commun.*, 2011, **47**, 3601–3603.
- 37 X.-J. Yang, B. Chen, L.-Q. Zheng, L.-Z. Wu and C.-H. Tung, *Green Chem.*, 2014, **16**, 1082–1086.
- 38 C. Zhang and N. Jiao, *Angew. Chem. Int. Ed.*, 2010, **49**, 6174–6177.
- 39 B. Dutta, S. Biswas, V. Sharma, N. O. Savage, S. P. Alpay and S. L. Suib, *Angew. Chem. Int. Ed.*, 2016, **55**, 2171–2175.
- 40 A. Gorrane, A. Corma and H. García, *Science*, 2008, **322**, 1661–1664.
- 41 A. Saha, S. Payra, B. Selvaratnam, S. Bhattacharya, S. Pal, R. T. Koodali and S. Banerjee, *ACS Sustainable Chem. Eng.*, 2018, **6**, 11345–11352.
- 42 S. Cai, H. Rong, X. Yu, X. Liu, D. Wang, W. He and Y. Li, *ACS Catal.*, 2013, **3**, 478–486.
- 43 F. Fu, S. He, S. Yang, C. Wang, X. Zhang, P. Li, H. Sheng and M. Zhu, *Sci. China Chem.*, 2015, **58**, 1532–1536.
